1 **Insulin promoted mobilization of GLUT4 from a perinuclear storage site requires RAB10.**

2

3 Alexandria Brumfield<sup>1</sup>, Natasha Chaudhary<sup>1</sup>, Dorothee Molle<sup>1</sup>, Jennifer Wen<sup>1</sup>, Johannes  
4 Graumann<sup>2</sup>, and Timothy E. McGraw<sup>1,3\*</sup>

5

6 <sup>1</sup>. Department of Biochemistry, Weill Cornell Medical College, New York, NY

7 <sup>2</sup>. Weill Cornell Medical College, Qatar

8 <sup>3</sup>. Department of Cardiothoracic Surgery, Weill Cornell Medical College, New York, NY

9

10 \* Corresponding author: [temcgraw@med.cornell.edu](mailto:temcgraw@med.cornell.edu)

11

12 Current address for Natasha Chaudhary: Lunenfeld-Tanenbaum Research Institute, Mount  
13 Sinai Hospital, Toronto, Ontario M5G 1X5, Canada.

14

15 Current affiliation for Johannes Graumann: Biomolecular Mass Spectrometry, Max Planck  
16 Institute for Heart and Lung Research, Bad Nauheim, Germany and The German Center for  
17 Cardiovascular Research (DZHK), Partner Site Rhine-Main, Max Planck Institute for Heart and  
18 Lung Research, Bad Nauheim, Germany

19

20 **Character Count: 34,500**

21

22

23 **Short running title: Insulin-stimulated mobilization of GLUT4 from the TGN**

24

25 **ABSTRACT**

26 Insulin controls glucose uptake into muscle and fat cells by inducing a net redistribution of  
27 GLUT4 from intracellular storage to the plasma membrane (PM). The TBC1D4-RAB10 signaling  
28 module is required for insulin-stimulated GLUT4 translocation to the PM, although where it  
29 intersects GLUT4 traffic was unknown. Here we demonstrate that TBC1D4-RAB10 functions to  
30 control GLUT4 mobilization from a Trans Golgi Network (TGN) storage compartment,  
31 establishing that insulin, in addition to regulating the PM proximal effects of GLUT4-containing  
32 vesicles docking to and fusion with the PM, also directly regulates the behavior of GLUT4  
33 deeper within the cell. We also show that GLUT4 is retained in an element/domain of the TGN  
34 from which newly synthesized lysosomal proteins are targeted to the late endosomes and the  
35 ATP7A copper transporter is translocated to the PM by elevated copper. Insulin does not  
36 mobilize ATP7A nor does copper mobilize GLUT4. Consequently, GLUT4 intracellular  
37 sequestration and mobilization by insulin is achieved, in part, through utilizing a region of the  
38 TGN devoted to specialized cargo transport in general rather than being specific for GLUT4.  
39 Our results define GLUT4-containing region of the TGN as a sorting and storage site from which  
40 different cargo are mobilized by distinct signals.

## 41 INTRODUCTION

42 Regulation of glucose uptake by fat and muscle cells, essential for the maintenance of whole-  
43 body glucose homeostasis, is determined by the levels of glucose transporter 4 (GLUT4) in the  
44 plasma membranes (PM) of these cells (1). GLUT4 cycles between intracellular compartments  
45 and the PM, with the distribution determined by the rates of exocytosis and endocytosis (2-5).  
46 The main effect of insulin is to stimulate GLUT4 exocytosis to increase the amount of PM  
47 GLUT4, thereby promoting increased glucose uptake (1).

48 In the basal state (unstimulated cells) the majority of GLUT4 resides intracellularly in perinuclear  
49 compartments that are in part Trans Golgi Network (TGN) in nature (6-8), and in specialized  
50 vesicles (referred to as insulin-responsive vesicles, IRVs) dispersed throughout the cytosol (9-  
51 11) whose delivery to the PM is regulated by insulin (2). GLUT4 in the PM cycles back to the  
52 TGN via the endosomal pathway (2, 12, 13). Targeting GLUT4 from endosomes to the TGN has  
53 an important role in basal intracellular GLUT4 retention. Mutations in GLUT4 that disrupt its  
54 traffic from endosomes to the TGN are poorly retained in basal conditions and are not properly  
55 translocated to the PM upon insulin stimulation (6, 14-16). These results identify the TGN as the  
56 site for formation of IRVs. The TGN is a main sorting compartment along the biosynthetic and  
57 endocytic pathways. Cargoes to be targeted to distinct destinations are sorted and packaged  
58 into the correct transport vesicles in the TGN. The relationship between the TGN containing  
59 GLUT4 and the TGN involved in the traffic of other cargoes is not known (2, 6, 8, 12).

60 Insulin signaling triggers multiple discrete molecular events that mediate efficient recruitment,  
61 docking, and fusion of IRVs with the PM (17-19). These events lead to a decrease in the size of  
62 the intracellular GLUT4 pool concomitant with an increase of GLUT4 in the PM. As GLUT4 in  
63 the PM is in equilibrium with intracellular GLUT4, endocytosis of GLUT4 dynamically removes  
64 GLUT4 from the PM. Thus, maintenance of the insulin-stimulated dynamic increase in GLUT4  
65 in the PM requires the continual ferrying of GLUT4-containing IRVs to the PM. Insulin signaling  
66 can add to the IRV pool by increasing the rate of GLUT4 mobilization from the TGN in nascent  
67 IRVs. Despite the biological importance, insulin regulation of GLUT4 trafficking at the  
68 perinuclear region has not been thoroughly interrogated.

69 A key aspect of insulin regulation of GLUT4 trafficking is inhibition of the GTPase-activating  
70 protein (GAP) TBC1D4/AS160 (20, 21), allowing for activation of its target RAB, RAB10 (22). In  
71 3T3-L1 adipocytes and primary adipocytes, knockdown of TBC1D4 releases the inhibition of

72 GLUT4 exocytosis in the basal state by 50% ([21](#), [23](#)), and depletion of RAB10 in cultured and  
73 primary adipocytes specifically blunts insulin-stimulated GLUT4 translocation by 50% ([22](#), [24](#),  
74 [25](#)). These data demonstrate insulin-stimulated GLUT4 exocytosis is regulated by both  
75 TBC1D4-RAB10-dependent and independent mechanisms. Overexpressed RAB10 has been  
76 shown to reside on IRVs in adipocytes ([13](#)), and total internal reflection fluorescence (TIRF)  
77 microscopy studies have demonstrated RAB10 functions at a step prior to IRV fusion with the  
78 PM ([24](#)). Thus, it is commonly thought RAB10 regulates IRV recruitment and/or docking with  
79 the PM. In other cell types RAB10 is required for regulated trafficking processes that involve  
80 vesicle delivery to the PM ([26-30](#)), and RAB10 has been shown to localize to both perinuclear  
81 and vesicular compartments ([29](#), [30](#)).

82 We have previously identified SEC16A as a novel RAB10-interacting protein required for insulin-  
83 stimulated GLUT4 translocation ([31](#)). Knockdown of SEC16A in 3T3-L1 adipocytes specifically  
84 blunts insulin-stimulated GLUT4 translocation by 50%, with no additivity of double knockdown of  
85 RAB10 and SEC16A ([31](#)). Interestingly, a pool of SEC16A localizes to structures in the  
86 perinuclear region that encircle GLUT4-containing perinuclear membranes ([31](#)). SEC16A is  
87 known to localize to endoplasmic reticulum exit sites (ERES) and act as a scaffold for  
88 organization of COPII components required for budding of COPII vesicles ([32](#), [33](#)). In  
89 adipocytes, SEC16A's role in GLUT4 trafficking is independent of its role in ERES function since  
90 knockdown of other components of the ER exit site machinery, which blunt secretion, are  
91 without effect on GLUT4 translocation ([31](#)). SEC16A's perinuclear localization, and lack of  
92 SEC16A localization to IRVs ([31](#)), suggests RAB10 might function at the perinuclear region to  
93 regulate GLUT4 trafficking. In this study we use a novel proteomic approach to demonstrate  
94 that GLUT4 resides in a region of TGN where specialized cargoes are sorted and mobilized by  
95 specific stimuli, and using a novel live-cell imaging assay we demonstrate insulin promotes the  
96 mobilization of GLUT4 from the TGN through RAB10 activity.

## 97 RESULTS

98 GLUT4 is retained in a region of the TGN from which specialized cargoes are sorted and  
99 mobilized.

100 The first approach we took to gain insight to GLUT4 trafficking at the perinuclear region was to  
101 identify proteins that reside with GLUT4 in the perinuclear compartment of 3T3-L1 adipocytes.  
102 It has previously been shown that mutation of the phenylalanine of the GLUT4 amino terminal  
103 F<sup>5</sup>QQI motif (amino acid positions 5 through 8) to a tyrosine (Y<sup>5</sup>QQI) redistributes GLUT4 to the  
104 TGN perinuclear compartment from cytosolic puncta (14). HA-GLUT4-GFP is a reporter  
105 extensively used in studies of GLUT4 traffic (34). HA-GLUT4-GFP with a F<sup>5</sup>QQI to Y<sup>5</sup>QQI  
106 mutation (F<sup>5</sup>Y-HA-GLUT4-GFP) displays enhanced intracellular retention in the TGN, as  
107 demonstrated by increased colocalization with TGN markers Syntaxin6 (STX6) and TGN46 (Fig.  
108 1A). F<sup>5</sup>Y-GLUT4 continually cycles to and from the PM, and thus is dynamically concentrated in  
109 the TGN (14). GLUT4 in which an alanine is substituted for phenylalanine in the F<sup>5</sup>QQI motif  
110 (F<sup>5</sup>A-GLUT4) is not as efficiently targeted to the TGN as compared to WT GLUT4 (14-16).  
111 Consequently, F<sup>5</sup>A-HA-GLUT4-GFP was predominantly localized in vesicular elements  
112 throughout the cytoplasm and was not well concentrated around the nucleus (Fig. 1A). Given  
113 F<sup>5</sup>Y-GLUT4 is enriched in the TGN as compared to both WT GLUT4 and F<sup>5</sup>A-GLUT4 (14), we  
114 reasoned proteins colocalized with GLUT4 in the TGN (the same TGN membrane as GLUT4)  
115 would be enriched in a detergent-free immunoabsorption of F<sup>5</sup>Y-GLUT4 because membrane  
116 integrity is preserved in this protocol. Membrane compartments containing HA-GLUT4-GFP  
117 were isolated by detergent-free immunoabsorption with anti-GFP-antibody from mechanically-  
118 disrupted unstimulated 3T3-L1 adipocytes stably expressing HA-GLUT4-GFP, F<sup>5</sup>Y-HA-GLUT4-  
119 GFP or F<sup>5</sup>A-GLUT4-GFP. We used stable isotope labelling with amino acids in culture (SILAC)  
120 to quantitatively compare by mass spectrometry proteins co-immunoabsorbed with these  
121 different GLUT4 constructs (35, 36). Pair-wise comparisons of WT versus F<sup>5</sup>Y and F<sup>5</sup>A versus  
122 F<sup>5</sup>Y were performed in duplicate inverting which cells were grown in the heavy amino acid  
123 medium, generating 4 different data sets of proteins immunoabsorbed with F<sup>5</sup>Y compared to WT  
124 (2 sets) and compared to F<sup>5</sup>A (2 sets).

125 There were 2360 proteins in the merged data from the 4 sets of data. The experimental  
126 premise that mechanical disruption preserves, at least partially, the integrity of membrane  
127 compartments/domains was validated by the fact that relative abundance (summed signal  
128 intensity) of proteins previously identified to colocalize but not directly interact with GLUT4,  
129 including: LNPEP (or IRAP) (37), LRP1 (9), RAB10 (13, 22) and Sortilin (38), were in the top 20%

130 of proteins ranked based on signal intensity (Fig. 1B). Of note, LNPEP, which is known to traffic  
131 via the same pathway as GLUT4 (37) and is therefore expected to be efficiently co-  
132 immunoabsorbed with GLUT4, was the 3<sup>rd</sup> most abundant protein in the immunoabsorption  
133 based on signal intensity.

134 The aim of this study was to identify proteins enriched in the F<sup>5</sup>Y-GLUT4 immunoabsorption;  
135 therefore, we focused our analyses on the set of 508 proteins that in the pooled data set were  
136 increased in the F<sup>5</sup>Y-GLUT4 immunoabsorption by greater than 1.3 fold by SILAC-ratio. Gene  
137 ontology cellular component analyses (39, 40) revealed a significant enrichment for proteins  
138 annotated to be localized to the TGN and TGN transport vesicles, including STX6 and TGN46  
139 (Fig. 1C). In addition, there was enrichment of Golgi, endosome, exocytic vesicles and the ER-  
140 to-Golgi intermediate compartment proteins (Fig. 1C), consistent with GLUT4 being dynamically  
141 distributed among a number of intracellular compartments (2).

142 Unexpectedly, there was also a significant enrichment of late endosome and lysosome proteins  
143 (Fig. 1C). This enrichment was not because F<sup>5</sup>Y-GLUT4 is localized to late  
144 endosomes/lysosomes as there is no significant colocalization between F<sup>5</sup>Y-GLUT4 and LAMP1  
145 (Fig. 1D). The majority of newly synthesized lysosomal proteins are delivered to the lysosomes  
146 by a pathway involving targeting from the TGN to the late endosomes (41). Soluble lysosome  
147 proteins, which are modified by mannose 6-phosphate in the ER, are diverted from delivery to  
148 the PM at the level of the TGN via a mechanism requiring the mannose 6-phosphate receptor  
149 (MPR) and the AP1 clathrin adaptin complex (41). Thus, an explanation for the enrichment of  
150 F<sup>5</sup>Y-GLUT4 with lysosomal proteins is that the GLUT4-containing perinuclear concentration is a  
151 specialized sub compartment of the TGN where lysosomal proteins are diverted from delivery to  
152 the PM by sorting to specialized transport vesicles. In support of that hypothesis, the MPR and  
153 the 4 subunits of the AP1 complex (AP1  $\mu, \sigma, \beta, \gamma$ ), components of the machinery that targets  
154 lysosomal proteins to the late endosomes, were significantly enriched in the F<sup>5</sup>Y-GLUT4  
155 immunoabsorption (Fig. 1E). Based on these data we propose that the region of the TGN  
156 enriched for F<sup>5</sup>Y-GLUT4 is involved in the sorting of cargoes that exit the TGN via specialized  
157 vesicles, diverting cargo from non-specialized vesicles that mediate constitutive traffic to the  
158 PM.

159 The immunoabsorption data identified the Menkes copper transporter, ATP7A, as enriched in  
160 the F<sup>5</sup>Y-GLUT4-containing perinuclear compartments (Fig 1E). Previous studies have also  
161 identified that ATP7A co-immunoabsorbs with GLUT4 (11). ATP7A, which is expressed in a

162 broad variety of cell types, has a role in protecting cells against copper overload. At  
163 physiological copper levels ATP7A primarily localizes to the TGN, but with an increased copper  
164 load ATP7A translocates to the PM, where it pumps copper from cells (42). In low copper  
165 conditions, achieved by treatment with copper chelator bathocuproinedisulfonic acid disodium  
166 salt (BCS), ATP7A was predominantly colocalized with GLUT4 in the TGN of 3T3-L1  
167 adipocytes, validating the mass spectrometry data (Fig. 2A & B). Challenging cells with elevated  
168 copper resulted in a decrease in the intensity of ATP7A in STX6-positive TGN and an increase  
169 in ATP7A labeling in cytosolic vesicles (Fig. 2A). Copper mobilization of ATP7A was reflected by  
170 a significant decrease in ATP7A overlap with STX6 (Fig. 2C). Insulin stimulation in adipocytes  
171 results in translocation of GLUT4 to the PM, as measured by ratiometric analyses of the HA-  
172 GLUT4-GFP reporter (Fig. 2D). Insulin stimulation did not affect ATP7A co-localization with  
173 STX6 (Fig. 2A & C), nor did elevated copper promote GLUT4 translocation to the PM (Fig. 2A &  
174 D). Thus, despite the high degree of colocalization of ATP7A and GLUT4, their mobilizations  
175 from the TGN are linked to distinct stimuli. These data support the hypothesis that the GLUT4-  
176 containing TGN compartment is a retention and sorting hub where various stimuli mobilize  
177 specific cargo.

#### 178 [Insulin increases the rate of GLUT4 mobilization from the perinuclear region.](#)

179 We next sought to demonstrate that insulin stimulation promotes the mobilization of GLUT4  
180 from the perinuclear region of 3T3-L1 adipocytes, similar to copper stimulation promoting the  
181 mobilization of ATP7A. With insulin stimulation it was visually apparent that the GLUT4-  
182 containing IRV pool was decreased in size concomitant with an increase in GLUT4 in the PM  
183 (Fig. 3A). However, in static images an effect of insulin on GLUT4 in the TGN was not  
184 apparent. Visualizing the mobilization of GLUT4 from the perinuclear compartment in live-cell  
185 imaging would prove very useful in determining if insulin regulates GLUT4 trafficking at the  
186 perinuclear region, yet has been confounded by the difficulty of distinguishing GLUT4-containing  
187 vesicles that have budded from the perinuclear compartments from those that have been  
188 endocytosed at the plasma membrane. To overcome this limitation we tagged GLUT4 with an  
189 irreversible green-to-red photoconvertible protein mEos3.2 (43) (HA-GLUT4-mEos3.2) and  
190 visualized the mobilization of HA-GLUT4-mEos3.2 that has been acutely photoconverted from  
191 green to red in a region of the perinuclear compartment, and thus could be distinguished from  
192 the remainder of HA-GLUT4-mEos3.2 in the cell (Fig. 3B). After photoconversion, the decrease  
193 over time in red HA-GLUT4-mEos3.2 intensity in the photoconverted region represents GLUT4  
194 that has been mobilized from the perinuclear region, and the return over time of the green HA-



195 GLUT4-mEos3.2 intensity in the photoconverted region represents GLUT4 that has been  
196 mobilized to the perinuclear region (Fig. 3B). Importantly, the trafficking of HA-GLUT4-mEos3.2  
197 was similar to the well characterized HA-GLUT4-GFP reporter (Fig. 3C). Furthermore, in fixed  
198 cells successive image acquisition did not result in a decrease in the red HA-GLUT4-mEos3.2  
199 intensity in the photoconverted region (Fig. 3D). These data argue that in live-cell imaging, any  
200 decrease in red HA-GLUT4-mEso3.2 intensity observed is not a result of photobleaching with  
201 successive image acquisition.

202 We first determined if insulin regulates the mobilization of GLUT4 from the perinuclear  
203 compartment. Under basal conditions red HA-GLUT4-mEos3.2 was mobilized from the  
204 photoconverted region with a rate  $k=0.033 \text{ min}^{-1}$  (Fig. 3E). Under insulin-stimulated conditions  
205 red HA-GLUT4-mEos3.2 was mobilized from the photoconverted region with a rate  $k=0.051$   
206  $\text{min}^{-1}$  (Fig. 3E), a 1.53 fold increase compared to basal conditions. These data are the first direct  
207 evidence demonstrating that insulin signaling accelerates mobilization of GLUT4 from the  
208 perinuclear region. Insulin-stimulated GLUT4 translocation in adipocytes and muscle requires  
209 activation of AKT (1). Insulin regulation of GLUT4 mobilization from the perinuclear region is  
210 downstream of AKT in 3T3-L1 adipocytes, and as compared to insulin in the presence of DMSO  
211 (vehicle), insulin in the presence of AKT inhibitor MK2206 (44) could not promote the  
212 mobilization of HA-GLUT4-mEos3.2 from the perinuclear region (Fig. 3E).

213 We next determined if insulin regulates the traffic of GLUT4 to the perinuclear region. In both  
214 basal (no stimulation) and insulin-stimulated conditions the green HA-GLUT4-mEos3.2 intensity  
215 in the photoconverted region returned to the pre-photoconversion intensities with half-times of  
216 approximately 5 minutes (Fig. 3F). Thus, GLUT4 return to the TGN is not regulated by insulin.  
217 This result coupled with our finding that GLUT4 constitutively traffics from the TGN (Fig. 3E),  
218 demonstrate that GLUT4 is dynamically concentrated in the peri-nuclear region.

### 219 RAB10 colocalizes with SEC16A and GLUT4 at the perinuclear region.

220 To investigate if RAB10 contributes to insulin-stimulated mobilization of GLUT4 from the  
221 perinuclear region, we first determined the localization of RAB10 in 3T3-L1 adipocytes by  
222 expressing RAB10 tagged with blue fluorescent protein (BFP-RAB10) (Fig. 4A and B). A pool of  
223 RAB10 localized to the perinuclear region under basal and insulin-stimulated conditions,  
224 suggesting its perinuclear localization is independent of its GDP/GTP state (Fig. 4A and B). As  
225 demonstrated previously, perinuclear SEC16A-labeled structures encircled HA-GLUT4-GFP-  
226 containing perinuclear TGN membranes under basal and insulin-stimulated conditions (31) (Fig.



227 **4A and B**). Perinuclear BFP-RAB10 colocalized with both perinuclear SEC16A and HA-GLUT4-  
228 GFP under basal and insulin-stimulated conditions, as demonstrated by linescan analyses (**Fig.**  
229 **4A and B**). In the context of the known functional role of RAB10 and SEC16A in GLUT4  
230 trafficking, these data raise the possibility that RAB10 and SEC16A function at the perinuclear  
231 region to regulate GLUT4 trafficking.

232 **The organization of RAB10-labeled, SEC16A-labeled, and GLUT4-containing perinuclear**  
233 **membranes is not random.**

234 The perinuclear region is compact in nature and contains a number of different membrane  
235 compartments (i.e. Golgi, ER-to-Golgi intermediate compartments (**ERGIC**), and ER). Thus, we  
236 sought to determine if the spatial organization of RAB10-labeled, SEC16A-labeled, and GLUT4-  
237 containing perinuclear membranes is simply due to this compact nature, or if their spatial  
238 organization is not random and is important to the function of RAB10 and SEC16A in GLUT4  
239 trafficking. To gain insight into this question we treated cells with nocodazole and determined if  
240 the RAB10-SEC16A-GLUT4 spatial organization is retained (**Fig. 5A and B**). The organization  
241 of the Golgi as a ribbon-like organelle and its perinuclear localization is highly dependent on an  
242 intact microtubule cytoskeleton ([45](#), [46](#)). Nocodazole-induced disruption of microtubule  
243 polymerization leads to fragmentation and dispersion of the Golgi throughout the cytosol ([45](#),  
244 [46](#)). When the Golgi fragments, Golgi ministacks are formed that retain the structural polarity of  
245 the *cis*-, *medial*-, and *trans*-Golgi. The Golgi ministacks are recapitulated at peripheral  
246 endoplasmic reticulum exit sites (**ERES**) to re-establish ER to Golgi secretion ([45](#)). With  
247 nocodazole treatment, we observed that the spatial organization of RAB10, SEC16A, and  
248 GLUT4 described above was retained under basal and insulin-stimulated conditions (**Fig. 5A**  
249 **and B**). By performing a radial line scan analysis centered on HA-GLUT4-GFP, we  
250 demonstrated SEC16A-labeled membranes remained adjacent to HA-GLUT4-GFP-containing  
251 membranes, and RAB10 remained localized with both SEC16A and GLUT4 (**Fig. 5C and D**).  
252 Furthermore, the average distance between peaks of HA-GLUT4-GFP fluorescence and  
253 SEC16A fluorescence was approximately 800nm in both the presence and absence of  
254 nocodazole (**Fig. 5E**). These data suggest the RAB10-SEC16A-GLUT4 perinuclear  
255 organization is not random and could be important for RAB10-SEC16A function in GLUT4  
256 trafficking.

257 Given the organization of perinuclear RAB10-SEC16A-GLUT4 is retained with nocodazole  
258 treatment, we reasoned the colocalization of cooper transporter ATP7A with GLUT4 at the TGN  
259 (**Fig. 2A and B**) should be retained in fragments formed with nocodazole treatment. Indeed, we

260 observed with nocodazole treatment that ATP7A colocalized with GLUT4 in a subset of GLUT4-  
261 containing fragments that contain Syntaxin6 (Fig. 5F).

262 **Perinuclear SEC16A is important for proper localization of RAB10 at the perinuclear region.**

263 Given SEC16A is known to act as a scaffold for organization of COPII components at ERES (32,  
264 33), we wondered whether perinuclear SEC16A analogously acts as a scaffold for organization  
265 of RAB10 at perinuclear membranes. We found 18% of total BFP-RAB10 localized to the  
266 perinuclear region under basal and insulin-stimulated conditions (Fig. 5G). Depletion of  
267 SEC16A resulted in a 30% decrease in BFP-RAB10 in the perinuclear region under basal and  
268 insulin-stimulated conditions (Fig. 5G), demonstrating the presence of the perinuclear pool of  
269 SEC16A is important for localizing RAB10 at perinuclear membranes. These data argue  
270 SEC16A-dependent localization of RAB10 at perinuclear membranes is independent of its  
271 GTP/GDP status, and if properly localized at the perinuclear region RAB10 bound to GTP can  
272 carry out its function in insulin-stimulated GLUT4 trafficking.

273 **The RAB10-AS160 module regulates GLUT4 mobilization from the perinuclear region.**

274 We next determined if RAB10 and its GAP TBC1D4 regulate the rate of GLUT4 mobilization  
275 from the perinuclear region. Depletion of TBC1D4 results in constitutive activation of RAB10  
276 (22), and knockdown of TBC1D4 in the absence of insulin stimulation led to acceleration of the  
277 mobilization of red HA-GLUT4-mEos3.2 from the perinuclear region near to the insulin-  
278 stimulated rate (Fig. 6A). The effect of TBC1D4 depletion on mobilization of HA-GLUT4-  
279 mEos3.2 was rescued by expression of shRNA-resistant TBC1D4 (Fig. 6A). In a RAB10  
280 knockdown background, insulin stimulation was unable to accelerate the mobilization of HA-  
281 GLUT4-mEos3.2 from the perinuclear region (Fig. 6B). Knockdown of RAB10 under basal  
282 conditions had no effect (Fig. 6B). Together, these data demonstrate TBC1D4 regulates  
283 mobilization of GLUT4 from the perinuclear region, and RAB10 is required for insulin-stimulated  
284 mobilization of GLUT4 from the perinuclear region.

285 A recent report in HeLa cells demonstrated RAB10 binding to the microtubule motor protein  
286 Kinesin 13A/B (KIF13A/B) is required for the tubulation of endosomes (28). However, in  
287 adipocytes depletion of KIF13A using 2 different siRNAs alone and in combination did not affect  
288 the amount of GLUT4 in the PM under basal or insulin-stimulated conditions compared to  
289 wildtype (WT) conditions (Fig. 6C and D). To explore the possibility that RAB10 mobilization of  
290 TGN GLUT4 in adipocytes requires a kinesin other than KIF13, we determined whether the  
291 effects of RAB10 depletion were additive to those of nocodazole-induced microtubule

292 depolymerization on GLUT4 translocation. Nocodazole treatment resulted in a 50% decrease in  
293 the amount of GLUT4 in the PM under insulin stimulation, consistent with previous reports ([2](#), [8](#),  
294 [47](#)), and the nocodazole induced decrease in the amount of GLUT4 in the PM was additive with  
295 RAB10 ([Fig. 6E](#)). Thus, Rab10 mediated mobilization of GLUT4 from the perinuclear region  
296 does not appear to be microtubule-dependent.  
297

## 298 DISCUSSION

299 Here we show that the GLUT4 peri-nuclear storage compartment is an element of the TGN from  
300 which newly synthesized lysosomal proteins are targeted to the late endosomes and the ATP7A  
301 copper transporter is translocated to the PM by elevated copper (Fig. 7). Consequently, GLUT4  
302 intracellular sequestration and mobilization by insulin is achieved, in part, through utilizing a  
303 region of the TGN devoted to specialized transport cargo in general rather than being specific  
304 for GLUT4. Our results define this TGN region as a sorting and storage site from which different  
305 cargo are mobilized by distinct signals.

### 306 [Insulin-stimulated acceleration of GLUT4 mobilization from the perinuclear region is regulated](#) 307 [by the TBC1D4-RAB10 module.](#)

308 In this study we developed a novel photoconversion and live cell imaging assay to determine  
309 the rates of GLUT4 trafficking to and from the perinuclear compartment under different  
310 conditions. We demonstrate in intact cells that insulin accelerates the mobilization of GLUT4  
311 from the perinuclear region by 50%. To date cell-free *in vitro* reconstitution assays using  
312 extracts of 3T3-L1 adipocytes and muscle cells have provided the best experimental evidence  
313 for insulin promoting the formation of IRVs from the TGN (10, 48). Incubation of donor  
314 membranes (i.e. the TGN) with insulin-stimulated cytosol results in an approximately 50%  
315 increase in the biogenesis of IRVs compared to incubation with basal cytosol, consistent with  
316 our results in live cells. We find insulin does not regulate GLUT4 recruitment to the perinuclear  
317 region. A large portion of GLUT4 in the PM is internalized by clathrin-mediated endocytosis  
318 together with constitutively recycling cargo such as TR (1). GLUT4-containing endosomes are  
319 sent to the TGN, and the observation that delivery of GLUT4 to the TGN is not regulated by  
320 insulin is not surprising given insulin stimulation has little effect on TR trafficking (1).

321 We demonstrate that the GTPase activating protein TBC1D4 and its target RAB, RAB10, are  
322 required for insulin-stimulated mobilization of GLUT4 from the perinuclear region. We find  
323 approximately 20% of BFP-RAB10 localizes to the perinuclear region and colocalizes with  
324 perinuclear GLUT4, supporting the finding that TBC1D4-RAB10 functions at the perinuclear  
325 region. Interestingly, RAB8A, the TBC1D4-target RAB required for insulin-stimulated GLUT4  
326 translocation in muscle, localizes to the perinuclear region in L6 muscle cells (49). We cannot  
327 exclude that RAB10 functions at the PM in addition to functioning at the TGN as suggested  
328 previously (13, 24). However, RAB10 functioning at the TGN in GLUT4 trafficking is in line with  
329 the function of RAB10 in other systems: RAB10 is involved in TLR4 trafficking from the TGN to

330 the PM (30), membrane trafficking from the TGN required for axon development (29), and  
331 membrane transport to the primary cilia (26).

332 Upon insulin stimulation in 3T3-L1 adipocytes, pre-formed GLUT4 vesicles rapidly dock and  
333 fuse with the PM, increasing GLUT4 in the PM until a maximum is reached at 10 minutes of  
334 stimulation (50). GLUT4 in the PM is continually internalized and trafficked to the TGN.  
335 Accelerating the formation of IRVs that can be trafficked to the PM allows the increase in PM  
336 GLUT4 to be maintained at longer lengths of insulin stimulation (50). Expression of a dominant-  
337 negative TBC1D4 construct (TBC1D4-DN), which is mutated in four of the six Akt  
338 phosphorylation sites, blocks the RAB10 regulated GLUT4 trafficking step (20). In cells  
339 expressing TBC1D4-DN, insulin transiently increases GLUT4 in the PM within 5 minutes of  
340 stimulation, however this increase cannot be maintained at longer lengths of insulin stimulation  
341 (21). Furthermore, with TBC1D4-DN expression insulin-stimulated recruitment of GLUT4 to the  
342 PM is biphasic, with rapid exocytosis of 40% of GLUT4, followed by slow exocytosis of the  
343 remaining GLUT4 (21). The ability of insulin to initially recruit GLUT4 to the PM indicates insulin  
344 promotes the recruitment, docking, and fusion of pre-formed GLUT4 vesicles, and thus the  
345 regulation of these steps is not directly dependent on TBC1D4-RAB10. Furthermore, at basal  
346 state approximately half of GLUT4 resides in vesicles (51), consistent with the observed rapid  
347 exocytosis of 40% of GLUT4 upon insulin stimulation. The inability of insulin to maintain the  
348 initial increase in GLUT4 in the PM and the inefficient exocytosis of 50% of GLUT4 is consistent  
349 with insulin being unable to accelerate the mobilization of GLUT4 from the TGN and with  
350 TBC1D4-RAB10 regulating this step. Interestingly, in 3T3-L1 fibroblasts insulin stimulation  
351 transiently increases the amount of GLUT4 in the PM within 10 minutes of stimulation, however  
352 this increase cannot be maintained over longer lengths of stimulation (16). One explanation of  
353 these data is 3T3-L1 fibroblasts express the machinery required for insulin-stimulated increase  
354 in efficiency of IRV docking and fusion with the PM, however, they do not express the  
355 machinery required for insulin-stimulated mobilization of GLUT4 from the perinuclear  
356 compartment. The expression of such machinery may be gained throughout differentiation.

357 Although we have established mobilization of GLUT4 from the TGN as an insulin-controlled step  
358 dependent on TBC1D4/RAB10, we have not as yet defined the mechanism of GLUT4  
359 mobilization. Insulin signaling could accelerate the biogenesis of IRVs at the TGN, or insulin  
360 signaling could accelerate the movement of newly formed IRVs from the perinuclear area. The  
361 latter could be accomplished by linking nascent IRVs to the cytoskeleton at the perinuclear

362 region. The kinesin motors KIF5B (52) and KIF3 (53) have been suggested to be required for  
363 insulin-stimulated GLUT4 translocation, and RAB10 interaction with KIF13A and KIF13B has  
364 recently be shown to be required for tubulation of endosomes in HeLa cells (28). However, we  
365 find that effects of nocodazole-induced microtubule depolymerization and siRNA-mediated  
366 depletion of RAB10 on insulin-stimulated GLUT4 translocation are additive, arguing RAB10-  
367 mediated mobilization of GLUT4 from the perinuclear region is not dependent on microtubules.  
368 RAB10 has been shown to interact with the myosin motor MYO5A (54), and RAB10-MYO5A  
369 interaction has been suggested to regulate IRV docking/fusion in adipocytes (13). Interestingly,  
370 in muscle MYO5A interaction with RAB8A is argued to regulate GLUT4 trafficking at the  
371 perinuclear region (49). Furthermore, in neurons RAB10 interaction with MYO5B is required for  
372 the fission of RAB10 vesicles at the TGN (29). Thus, it may be useful to think about RAB10  
373 possibly interacting with myosin motors to regulate IRV formation and/or link them to the  
374 cytoskeletal system. Of note, KIF13B, KIF5B, and MYO5A were present in immunoabsorbed  
375 GLUT4-containing membranes, however none were differentially immunoabsorbed in F<sup>5</sup>Y-  
376 GLUT4 membranes.

377 SEC16A is important for RAB10 localization at the perinuclear region.  
378 Here we have advanced the understanding of the role of SEC16A in GLUT4 trafficking. We  
379 show the previously described SEC16A-labeled structures that surround GLUT4 in the  
380 perinuclear TGN (31), are also associated with RAB10. The spatial organization of perinuclear  
381 GLUT4-SEC16A-RAB10 is not random. Nocodazole depolymerization of microtubules  
382 disperses GLUT4 (45, 46), yet the organization of GLUT4-SEC16A-RAB10 is retained. The  
383 distance between adjacent peaks of GLUT4 and SEC16A is approximately 800nm with or  
384 without nocodazole treatment, and RAB10 remains colocalized with GLUT4 and SEC16A. A  
385 peak-to-peak distance of 800nm is in line with the average diameter of a Golgi cisternae, which  
386 has been calculated to range from 500-1000nm (55). We further find that siRNA-mediated  
387 depletion of SEC16A results in a 30% reduction of RAB10 in the perinuclear region under basal  
388 and insulin-stimulated states. These data argue SEC16A is important for localizing RAB10 to  
389 the perinuclear region, and SEC16A can bind to RAB10 whether it is bound to GDP or GTP.  
390 These data are consistent with the known role of SEC16A at ERES, where it acts as a scaffold  
391 for organization of COPII components (32, 33).

392 Mutations in the leucine-rich repeat kinase 2 (LRRK2) are associated with Parkinson's disease  
393 (PD). LRRK2 has been suggested to regulate SEC16A localization at ERES (56). More

394 recently LRRK2 has been shown to phosphorylate a subset of RAB proteins, including RAB10  
395 ([57](#)). RAB10 phosphorylation status at LRRK2 sites has been implicated in regulation of  
396 ciliogenesis, and expression of mutant LRRK2 with defects in ciliogenesis ([58](#), [59](#)). It will be  
397 interesting to determine if PD-associated mutations in LRRK2 have any effect on GLUT4  
398 trafficking in adipocytes.

#### 399 [A role for the GLUT4-containing TGN in the biogenesis and sorting of specialized vesicular](#) 400 [carriers.](#)

401 We identified the protein composition of the GLUT4-containing TGN by identifying proteins  
402 enriched in F<sup>5</sup>Y-GLUT4 immunoabsorption compared to WT and F<sup>5</sup>A-GLUT4-containing  
403 immunoabsorption. The enrichment of lysosomal enzymes known to traffic from the TGN to late  
404 endosomes/lysosomes and the ATP7A copper transporter lead us to conclude that IRVs form  
405 from a region of the TGN where unrelated transport vesicles containing other specialized cargos  
406 form. None of the specialized vesicles formed at the GLUT4-containing TGN follow the  
407 transferrin receptor (TR)-containing constitutive trafficking pathway from the TGN to the PM,  
408 suggesting GLUT4 and specialized cargo reside in a region of the TGN distinct from the region  
409 where vesicles that constitutively traffic form. We do not know if the detergent-free cell lysis  
410 method used in the immunoabsorption of GLUT4-containing compartments keeps individual  
411 stacks of the TGN intact, or if the method results in fragmentation of a TGN stack. However, the  
412 enriched immunoabsorption of cargo whose trafficking is specialized, but not constitutively  
413 recycling cargo, argues we are able to distinguish different regions or subdomains of the TGN.  
414 Interestingly, when GLUT4 is ectopically expressed in cell types that do not natively express  
415 GLUT4, such as fibroblasts, CHO cells, and HeLa cells, an insulin regulated recycling  
416 mechanism does exist, albeit less robust than in adipocytes ([12](#), [60](#)). Specifically, it has been  
417 demonstrated that GLUT4 travels to the PM in vesicles that are distinct from vesicles carrying  
418 constitutively recycling cargo ([12](#)). The ATP7A copper transporter is more widely expressed  
419 than is GLUT4. Hence, the specialized TGN subdomain that contains GLUT4 and ATP7A in  
420 3T3-L1 adipocytes likely exists in other cell types that do not natively expressing GLUT4  
421 explaining why there is rudimentary insulin-regulation of GLUT4 traffic when it is ectopically  
422 expressed in these other cell types.

423 Two major destinations for proteins in the TGN are the late endosome/lysosome and the PM.  
424 The mannose 6-phosphate receptor (MPR) and AP1 clathrin adaptin complex are required for  
425 diverting cargo destined for the late endosome/lysosome away from the PM ([41](#)). Their  
426 enrichment in F<sup>5</sup>Y-GLUT4-containing perinuclear compartments argues the GLUT4-containing



427 TGN is the site where lysosomal enzymes are sorted into specialized transport vesicles that  
428 traffic to the late endosome/lysosome. Previous immunofluorescence and electron microscopy  
429 studies have demonstrated GLUT4 colocalizes with MPR (4) and AP1 (61), validating their  
430 enrichment. Trafficking of the copper transporter ATP7A between the TGN and the PM is  
431 known to be tightly regulated by copper load to maintain copper homeostasis (42). Enrichment  
432 of ATP7A in F<sup>5</sup>Y-GLUT4-containing perinuclear compartments argues the GLUT4-containing  
433 TGN is also the site where select regulated recycling membrane proteins are packaged in  
434 transport vesicles that travel to the PM. Colocalization of ATP7A with GLUT4 in the TGN is  
435 supported by the observation that with nocodazole treatment ATP7A remains colocalized with  
436 GLUT4 in a subset of fragments. ATP7A is mobilized from the GLUT4-containing TGN in  
437 response to elevated copper, but not insulin stimulation. On the other hand, copper stimulation  
438 does not induce translocation of GLUT4. These data demonstrate stimuli mobilize specific  
439 cargo from the GLUT4-containing TGN.

440 Proteins localized to the TGN and TGN transport vesicles were the most significantly enriched  
441 in F<sup>5</sup>Y-GLUT4-containing perinuclear compartments. However, there was also an enrichment of  
442 endosome, Golgi, and ER-to-Golgi intermediate compartment (ERGIC) proteins. These  
443 compartments are found in the compact perinuclear region, raising the possibility that the  
444 packaging and sorting of cargo in transport vesicles at the perinuclear region involves the  
445 interplay of membrane compartments of different natures. In human cells a clathrin heavy chain  
446 isoform, CHC22, has been proposed to function at the ERGIC to sequester newly synthesized  
447 GLUT4 in insulin responsive vesicles (IRVs) (60). Mice do not have an equivalent CHC22 gene  
448 and it has been suggested that CHC17 isoform might substitute for CHC22 in regulation of  
449 GLUT4 in mice (60). It is of interest to note that mouse clathrin heavy chain protein (CLTC)/  
450 CHC17 was one of the most abundant proteins based on signal intensity in all 4  
451 immunoabsorption experiments, although CLTC was not differentially absorbed in any of the  
452 comparisons. Clathrin is required for AP1-mediated vesicle trafficking between the TGN and  
453 late endosome, and therefore immunoisolation of clathrin with GLUT4 is consistent with GLUT4  
454 localization to the region of the TGN where AP1-containing vesicles are formed.

455

## 456 MATERIALS AND METHODS

457 **cDNA constructs, siRNA, antibodies, chemicals, and drugs.** cDNA constructs encoding  
458 wild-type (WT), F<sup>5</sup>Y, F<sup>5</sup>A-HA-GLUT4-GFP, and TBC1D4 have been previously described ([20](#),  
459 [62](#), [63](#)). The HA-GLUT4-mEos3.2 cDNA construct was generated by replacing GFP in the HA-  
460 GLUT4-GFP cDNA construct for mEos3.2 (Addgene plasmid #54525) ([43](#)) through restriction  
461 cloning. KpnI and BamHI restriction sites respectively flank the N- and C-terminuses of GFP.  
462 A wobble mutation was made at an internal KpnI site in mEos3.2 to prevent its digestion using  
463 the QuikChange II XL Site-Directed Mutagenesis kit (200521; Agilent Technologies) and  
464 following primer pair: 5'-GTT CGA TTT TAT GGT ACT AAC TTT CCC GCC AAT GG-3' and 5'-  
465 CCA TTG GCG GGA AAG TTA GTA CCA TAA AAT CGA AC-3'. mEos3.2 with the wobble  
466 internal KpnI site was PCR amplified with an N-terminal primer containing a KpnI restriction site:  
467 5'-GCTTGGTACCATGAGTGCG-3', and C-terminal primer containing a BamHI restriction site:  
468 5'-GCTAGGATCCTTATCGTCTGGC-3'. The BFP-RAB10 cDNA construct was a kind gift from  
469 Gia Voeltz at University of Colorado Boulder.

470 Antibodies against Syntaxin6 (ab12370; Abcam and 2869T; Cell Signaling), TGN46  
471 (ab16059; Abcam), LAMP1 (ab25630; Abcam), ATP7A (LS-C209614; LSBio), GM130 (610822;  
472 BD Transduction), SEC16A (KIAA0310; ProteinExpress), and Haemagglutinin (HA) tag  
473 (901503; Biologend) were used for immunofluorescence.

474 Chemicals and drugs used were MK-2206 (11593; Cayman), Nocodazole (M1404;  
475 Sigma-Aldrich), Bathocuproinedisulfonic acid disodium salt (BCS) (B1125-500MG; Sigma-  
476 Aldrich), and Copper(II) chloride dehydrate (C3279; Sigma-Aldrich).

477 The siRNA constructs targeting RAB10 and SEC16A were as previously published.  
478 RAB10: si251, 5'-GCA UCA UGC UAG UGU AUGA-3' (same sequence as shRNA expressed  
479 by RAB10 KD cells; [22](#)). SEC16A: si1, 5'-CTT CAG AAT ATC AGC TCC CTG GGG CTC-3',  
480 si3, 5'-AGC TGG ACT TGC TGG TGG CTG GGC CAA-3' ([31](#)) (two siRNA were used to target  
481 SEC16A to achieve a greater reduction in RNA). The siRNAs for KIF13A and KIF13B were  
482 designed at Integrated DNA Technologies (IDT). KIF13A: si2, 5'-ATC CTT TAA ATA GTA AAC  
483 CAG AAG CTC-3'. KIF13B: si2, 5'-CAC ATT TGG TAT GTA AGT CAA TTT CTC-3'.

484  
485 **Cell lines and culture.** 3T3-L1 pre-adipocytes (fibroblasts) were cultured and differentiated  
486 into adipocytes as previously described (Zeigerer et al., 2002). Experiments were performed on  
487 day 5 after differentiation. 3T3-L1 adipocyte cell lines stably expressing shRNA sequences  
488 against RAB10 or TBC1D4 have been described previously ([21](#), [22](#)).

489 Immunoabsorption experiments were performed using 3T3-L1 cell lines stably  
490 expressing WT and mutant HA-GLUT4-GFP. To generate these cell lines, cDNA constructs  
491 encoding wild-type (WT), F<sup>5</sup>Y, and F<sup>5</sup>A-HA-GLUT4-GFP (62, 63) were subcloned into the  
492 pLenti6/V5-D<sup>TM</sup>-TOPO® vector (K4955-10; Life Technologies). 293FT packaging cells were  
493 transfected with lentiviral cDNA using Lenti-X packaging system (631276; Takara). Cultured  
494 media containing lentiviral particles was harvested after 72h and used to infect 3T3-L1 pre-  
495 adipocytes. HA-GLUT4-GFP-positive cells were sorted by FACS and cultured in selection  
496 medium supplemented with blasticidin (A11139-03; Invitrogen).

497  
498 **Electroporation of adipocytes.** Differentiated 3T3-L1 adipocytes were electroporated with 45-  
499 55µg of cDNA constructs as described previously (50). Adipocytes were electroporated with  
500 2nmol of siRNA where indicated. When two siRNAs were used 2 nmol of each siRNA was  
501 electroporated. Assays were performed 12-72 hours post electroporation as described.

502  
503 **Quantitative RT-PCR.** Measurement of KIF13A and KIF13B siRNA-mediated knockdown was  
504 performed by quantitative RT-PCR. At 72 hours post electroporation, cells were harvested,  
505 RNA extracted using the RNeasy kit (74106; QIAGEN), and cDNA prepared from extracted  
506 RNA using the RNA to cDNA EcoDry Premix (639545; Takara Bio Inc.). Quantitative RT-PCR  
507 was performed using appropriate primer pairs from the PrimerBank database. Primer pair to  
508 KIF13A: Forward, 5'-TCG GAT ACG AAG GTA AAA GTT GC-3' and Reverse, 5'-CTG CTT  
509 AGT GTT GGA AGG AGG-3'. Primer pair to KIF13B: Forward, 5'-GCT CTG TAG TGG ACT  
510 CTT TGA AC-3' and Reverse, 5'-TTT GGG GTC AAG AAG GTC TCG-3'.

511  
512 **GLUT4 translocation (surface-to-total).** HA-GLUT4-GFP has a HA-epitope engineered into  
513 the first exofacial loop and GFP fused to its cytoplasmic carboxyl domain. The amount of the  
514 reporter in the PM of individual cells was determined by anti-HA immunofluorescence,  
515 normalized to the GFP fluorescence. GLUT4 translocation assay was performed as described  
516 previously (62). Briefly, cells expressing HA-GLUT4-GFP were incubated in serum free media  
517 for 2 hours. Cells were stimulated with 1nM or 10nM insulin for 30 minutes to achieve steady  
518 state GLUT4 surface levels. Cells were fixed with 3.7% formaldehyde for 6-10 minutes, and an  
519 anti-HA antibody (901503; Biolegend) was used, without permeabilization, to label HA-GLUT4-  
520 GFP on the cell surface. HA staining was visualized with Cy3 fluorescently tagged secondary  
521 antibody (115-165-062; Jackson ImmunoResearch) and total HA-GLUT4-GFP was visualized by  
522 direct fluorescence, as described later.

523

524 **Copper Transporter ATP7A mobilization assay.** HA-GLUT4-GFP expressing cells were  
525 treated with 200 $\mu$ M Bathocuproinedisulfonic acid disodium salt (BCS) for 2 hours to achieve low  
526 copper conditions, followed by stimulation with 200 $\mu$ M Copper(II) chloride dehydrate for 2 hours  
527 or 1nM insulin for 30 minutes. Cells were fixed and stained for native ATP7A and Syntaxin6 in  
528 the presence of 0.5mg/ml saponin.

529

530 **HA-GLUT4-mEos3.2 Photoconversion Assay.** HA-GLUT4-mEos3.2 expressing cells were  
531 serum starved for 2 hours in live cell imaging media containing Dulbecco's Modified Eagle's  
532 Medium (DMEM) without phenol red (D5030; Sigma-Aldrich) and supplemented with 4500 mg/L  
533 D-glucose (G7528; Sigma-Aldrich), 4mM L-glutamine (G8540; Sigma-Aldrich) 4.76 g/L HEPES  
534 (H3375; Sigma-Aldrich), 1mM sodium pyruvate (11360, Life Technologies), and 2.5g/L Sodium  
535 Bicarbonate (S6297; Sigma-Aldrich) at pH 7.2. Where indicated cells were subsequently  
536 stimulated with 10nM insulin for 10 minutes. Cells were then transferred to the confocal  
537 microscope, where they were housed in an incubation chamber at 37°C, 5% CO<sub>2</sub>. Set up on  
538 the scope took approximately 5 minutes once the sample was placed, thus making the total  
539 incubation time in insulin prior to photoconversion 15 minutes (at 15 minutes of insulin  
540 stimulation, cells have achieved insulin-stimulated steady state conditions). For experiments  
541 where the AKT inhibitor MK2206 was added, cells were treated with 1 $\mu$ M MK2206, or equivalent  
542 volume of DMSO, for the last hour of the starvation period, as well as during the 15 minute  
543 incubation period with insulin (75 minutes total).

544

545 **Microscopy, image quantification, and statistical analysis.**

546 **Epifluorescence.** Epifluorescence images were collected on an inverted microscope at room  
547 temperature using a 20x air objective (Leica Biosystems) and a cooled charge-coupled device  
548 12-bit camera. Exposure times and image quantification ([12](#)) were performed using MetaMorph  
549 image processing software (Universal Imaging) as previously described. GFP and Cy3  
550 fluorescence signals were background corrected and the surface(Cy3)/total(GFP) (S/T) GLUT4  
551 was calculated for each cell. The S/T values were normalized within each assay to the mean  
552 S/T value for the indicated condition to allow for averaging results across multiple biological  
553 repeat assays. Unpaired student's *t* tests were performed on raw (non-normalized) S/T mean  
554 values from multiple assays. To quantify the fraction of BFP-RAB10 in the perinuclear region,  
555 cells were co-transfected with HA-GLUT4-GFP. Perinuclear HA-GLUT4-GFP was used as a  
556 marker to create an outline of the perinuclear region, and the outline was transferred to the

557 image of BFP-RAB10. As a measure of the fraction of BFP-RAB10 in the perinuclear region,  
558 the integrated BFP-RAB10 intensity in the outlined perinuclear region was calculated, and  
559 divided by the total integrated intensity of BFP-RAB10 in the cell. Unpaired student's *t* tests  
560 were performed on raw (non-normalized) S/T mean values from multiple assays.

561 **Airyscan confocal experiments.** Airyscan confocal images were collected on a laser  
562 scanning microscope (LSM880; ZEISS) with Airyscan using a 63x objective. Pearson's  
563 correlation coefficient (*r*) for HA-GLUT4-GFP and ATP7A was calculated with MetaMorph  
564 software by generating binary masks of HA-GLUT4-GFP and ATP7A using the 98<sup>th</sup> percentile  
565 grayscale value. For quantification of native ATP7A overlap with Syntaxin6, a threshold using  
566 the 98<sup>th</sup> percentile grayscale value was set on the image of native ATP7A and on the image of  
567 Syntaxin6. A binary mask of the thresholded Syntaxin6 was generated, and percent of  
568 thresholded ATP7A intensity under the mask was calculated. Unpaired student's *t* tests were  
569 performed on individual cells from the indicated conditions.

570 **Linescan analyses.** Linescan plots were generated using the Linescan application in  
571 MetaMorph or Image J. Radial linescan plots were generated using the Radial Profile Plot  
572 plugin in Image J (<https://imagej.nih.gov/ij/plugins/radial-profile.html>). For each radial linescan  
573 plot, five HA-GLUT4-GFP fragments were selected based on high HA-GLUT4-GFP intensity. A  
574 circle with a radius of 40 pixels was applied to the fragment and centered on the peak of HA-  
575 GLUT4-GFP fluorescence. A plot of normalized integrated HA-GLUT4-GFP, SEC16A, and  
576 BFP-RAB10 fluorescence intensities around the circle (sum of integrated pixel values around  
577 circle/ total number of pixels) (y-axis) were plotted for each distance from the center of the circle  
578 (x-axis).

579 **HA-GLUT4-mEos3.2 photoconversion and live cell imaging.** Photoconversion of HA-  
580 GLUT4-mEos3.2 and image collection was performed on a laser scanning microscope  
581 (LSM880; ZEISS) with incubation chamber using a 63x objective. Green and red pre-  
582 photoconversion images of a cell expressing HA-GLUT4-mEos3.2 were acquired by excitation  
583 with 488nm and 561nm lasers, respectively. A high scan speed of 10, no averaging, and a low  
584 laser power of 0.2% were used to prevent photobleaching. A designated section of the  
585 perinuclear region was then bleached with a 405nm laser at 20% power, scan speed of 7 for 12  
586 cycles. Green and red post-photoconversion images of the cell expressing HA-GLUT4-  
587 mEos3.2 were acquired every 2 minutes for a total of 20 minutes. The definite focus option was  
588 used in attempt to prevent drift in the z axis. For the average red intensity value in the  
589 photoconverted region at each time point post-photoconversion, the pre-photoconversion red  
590 intensity value was subtracted in MetaMorph. Values were then normalized to the 0 minute

591 post-photoconversion value and the natural log taken. After averaging across multiple cells, a  
592 linear curve fit was applied. Statistical comparison of slopes was performed in Prism by  
593 calculating a two-tailed p value from testing the null hypothesis that the slopes are identical. For  
594 the average green intensity value at each time point post-photoconversion, the pre-  
595 photoconversion green intensity value was subtracted. Values were then normalized to the  
596 negative value of the 0 minute time point post-photoconversion, and added to 1. After  
597 averaging across multiple cells, an exponential curve fit was applied.

598

599 **Immuno-isolation of native GLUT4-containing compartments, SILAC mass spectrometry,**  
600 **and data processing.** Each pair-wise comparison was performed in inverted Forward and  
601 Reverse labeling conditions.

602 For the WTvsF<sup>5</sup>Y comparison, the labeling design was i) Forward condition: WT HA-  
603 GLUT4-GFP cells grown in light SILAC medium versus F<sup>5</sup>Y-HA-GLUT4-GFP cells grown in  
604 heavy SILAC medium and ii) Reverse condition: WT HA-GLUT4-GFP cells grown in heavy  
605 SILAC medium versus F<sup>5</sup>Y-HA-GLUT4-GFP cells grown in light SILAC medium.

606 For the F<sup>5</sup>YvsF<sup>5</sup>A comparison, the labeling design was i) Forward condition: F<sup>5</sup>Y-HA-  
607 GLUT4-GFP cells grown in light SILAC medium versus F<sup>5</sup>A-HA-GLUT4-GFP cells grown in  
608 heavy SILAC medium and ii) Reverse condition: F<sup>5</sup>Y-HA-GLUT4-GFP cells grown in heavy  
609 SILAC medium versus F<sup>5</sup>A-HA-GLUT4-GFP cells grown in light SILAC medium.

610 The objective of this experiment was to identify by SILAC mass spectrometry proteins  
611 colocalized with GLUT4 in the perinuclear compartment based on enrichment with F<sup>5</sup>Y-GLUT4  
612 in immunoabsorption, not to identify all proteins in GLUT4-containing compartments. Therefore,  
613 we did not include a control condition to identify proteins that are non-specifically absorbed  
614 during the immunoisolation.

615 **Stable isotope labeling of cultured cells.** Stable HA-GLUT4-GFP-expressing 3T3-L1 pre-  
616 adipocytes were grown for 5 doublings and differentiated in Lysine (LYS) and Arginine (ARG)-  
617 deficient DMEM (89985; Thermo Scientific), supplemented with 10% dialyzed FBS, and 42ug/ml  
618 of either LYS-HCL and ARG-HCL normal isotopes (Light SILAC medium) or with <sup>13</sup>C<sub>6</sub>LYS and  
619 <sup>13</sup>C<sub>6</sub>LYS, <sup>15</sup>N<sub>4</sub> ARG isotopes (Heavy SILAC medium) (89983 and 88210; Pierce) at 37°C in 5%  
620 CO<sub>2</sub>. Under these conditions, the isotopes incorporation efficiency was higher than 95%,  
621 without detectable arginine to proline conversion.

622 **Immuno-isolation of GLUT4-containing compartments.** Day 5 post-differentiation, labeled  
623 stable HA-GLUT4-GFP-expressing 3T3-L1 adipocytes were incubated in serum-free either Light  
624 or Heavy SILAC media for 2 h at 37°C in 5% CO<sub>2</sub> to establish basal GLUT4 retention. Cells



625 were washed one time with PBS, harvested into 1 ml of HES buffer (20mM HEPES, 1mM  
626 EDTA, 250mM sucrose, and protease inhibitors) and homogenized by subsequent passage  
627 through 22G<sup>1/2</sup> and 27G<sup>1/2</sup> syringes on ice. Total cell homogenates were cleared by successive  
628 centrifugations at 1000g for 10 minutes to remove unbroken cells, nuclei and fat. Protein  
629 concentration of both Light-cultured cells and Heavy-cultured cells was measured by BCA assay  
630 (23225; Thermo Scientific) and homogenates were mixed to a 1:1 ratio. HA-GLUT4-GFP-  
631 containing compartments were isolated by incubation for 30 minutes at 4°C with magnetic GFP-  
632 bound beads (130-091-125; Miltenyi Biotech). Beads were washed 5 times in PBS  
633 supplemented with protease inhibitors and absorbed material was eluted with elution buffer  
634 (50mM Tris HCl (pH6.08), 50 mM DTT, 1%SDS, 1nM EDTA, 0.005% bromophenol blue, 10%  
635 glycerol).

636 **LC-MS/MS and Bioinformatics analysis.** Eluates were resolved on 5-20% gradient SDS-  
637 Page gel and subjected to in-gel digest followed by LC-MS/MS analysis as described (64).  
638 Peptide/spectrum matching as well as false discovery control (1% on the peptide and protein  
639 levels, both) and protein quantitation were performed using the MaxQuant suite of algorithms  
640 (65). We used the SILAC ratio of polypeptides in the immunoabsorbates to identify proteins  
641 enriched with F<sup>5</sup>Y-GLUT4. The comparisons of F<sup>5</sup>Y to WT and F<sup>5</sup>Y to F<sup>5</sup>A were performed twice,  
642 switching which sample was labeled with heavy amino acids. We identified the proteins whose  
643 average ratios in the two F<sup>5</sup>Y vs WT and F<sup>5</sup>Y vs F<sup>5</sup>A experiments were greater than 1.3 fold with  
644 a 'significance B' (65) < 0.05, falling back on the method due to the small n. There were 508  
645 proteins enriched in the F<sup>5</sup>Y vs the combined WT and F<sup>5</sup>A data sets. We used the merged data  
646 set for downstream computational analyses.

647



648 **AUTHOR CONTRIBUTIONS:** A. Brumfield, N. Chaudhary, D. Molle, and J. Wen designed,  
649 performed, and analyzed experiments. J. Graumann performed mass spectrometry. A.  
650 Brumfield and T.E. McGraw wrote the manuscript. T.E. McGraw conceived of the project,  
651 designed and analyzed experiments, and supervised the project.

652

653 **CONFLICT OF INTEREST STATEMENT:** The authors declare that the work was performed in  
654 the absence of any financial relationships that could be construed as a potential conflict of  
655 interest.

656

657 **ACKNOWLEDGEMENTS:** We thank Leona Cohen-Gould and Sushmita Mukherjee at the  
658 Weill Cornell Medicine Optical Microscopy Core where confocal microscopy was performed, and  
659 Harold Skip Ralph at the Weill Cornell Medicine Automated Optical Microscopy Core for help  
660 with image analysis. We thank Gus Lienhard (Dartmouth Medical School), Maria Belen  
661 Picatoste Botija, Rosemary Leahey, Anudari Letian, Anuttoma Ray, Lucie Yammine, and Eyoel  
662 Yemanaberhan for helpful discussions and critically reading the manuscript. This research was  
663 supported by NIH RO1 DK52852 to T.E.M, NIH 5T32 GM008539 (AB), and an American  
664 Diabetes Association mentor-based fellowship award to TEM.

665

#### 666 **ABBREVIATIONS LIST**

667 Glucose Transporter 4, GLUT4

668 Menkes Copper-Transporting ATPase, ATP7A

669 Plasma Membrane, PM

670 *Trans*-Golgi Network, TGN

671 Endocytic Recycling Compartment, ERC

672 ER-to-Golgi Intermediate Compartment, ERGIC

673 Endoplasmic Reticulum Exit Site, ERES

674 Insulin-responsive vesicles, IRVs

675 Transferrin receptor, TR

676 Immunofluorescence, IF

677 Syntaxin6, STX6

678 *Trans*-Golgi Network Protein 2, TGN46

679

680

681 **REFERENCES**

- 682 1. Klip A, McGraw TE, James DE. Thirty sweet years of GLUT4. *The Journal of biological*  
683 *chemistry*. 2019;294(30):11369-81.
- 684 2. Karylowski O, Zeigerer A, Cohen A, McGraw TE. GLUT4 is retained by an intracellular  
685 cycle of vesicle formation and fusion with endosomes. *Molecular biology of the cell*.  
686 2004;15(2):870-82.
- 687 3. Martin OJ, Lee A, McGraw TE. GLUT4 distribution between the plasma membrane and  
688 the intracellular compartments is maintained by an insulin-modulated bipartite dynamic  
689 mechanism. *The Journal of biological chemistry*. 2006;281(1):484-90.
- 690 4. Martin S, Millar CA, Lyttle CT, Meerloo T, Marsh BJ, Gould GW, et al. Effects of insulin  
691 on intracellular GLUT4 vesicles in adipocytes: evidence for a secretory mode of regulation.  
692 *Journal of cell science*. 2000;113 Pt 19:3427-38.
- 693 5. Foster LJ, Li D, Randhawa VK, Klip A. Insulin accelerates inter-endosomal GLUT4 traffic  
694 via phosphatidylinositol 3-kinase and protein kinase B. *The Journal of biological chemistry*.  
695 2001;276(47):44212-21.
- 696 6. Shewan AM, van Dam EM, Martin S, Luen TB, Hong W, Bryant NJ, et al. GLUT4  
697 recycles via a trans-Golgi network (TGN) subdomain enriched in Syntaxins 6 and 16 but not  
698 TGN38: involvement of an acidic targeting motif. *Molecular biology of the cell*. 2003;14(3):973-  
699 86.
- 700 7. Li Lin V, Bakirtzi K, Watson Robert T, Pessin Jeffrey E, Kandror Konstantin V. The C-  
701 terminus of GLUT4 targets the transporter to the perinuclear compartment but not to the insulin-  
702 responsive vesicles. *Biochemical Journal*. 2009;419(1):105-13.
- 703 8. Foley KP, Klip A. Dynamic GLUT4 sorting through a syntaxin-6 compartment in muscle  
704 cells is derailed by insulin resistance-causing ceramide. *Biology Open*. 2014;3(5):314-25.
- 705 9. Jedrychowski MP, Gartner CA, Gygi SP, Zhou L, Herz J, Kandror KV, et al. Proteomic  
706 analysis of GLUT4 storage vesicles reveals LRP1 to be an important vesicle component and  
707 target of insulin signaling. *The Journal of biological chemistry*. 2010;285(1):104-14.
- 708 10. Xu Z, Kandror KV. Translocation of small preformed vesicles is responsible for the  
709 insulin activation of glucose transport in adipose cells. Evidence from the in vitro reconstitution  
710 assay. *The Journal of biological chemistry*. 2002;277(50):47972-5.
- 711 11. Larance M, Ramm G, Stockli J, van Dam EM, Winata S, Wasinger V, et al.  
712 Characterization of the role of the Rab GTPase-activating protein AS160 in insulin-regulated  
713 GLUT4 trafficking. *The Journal of biological chemistry*. 2005;280(45):37803-13.
- 714 12. Lampson MA, Schmoranzer J, Zeigerer A, Simon SM, McGraw TE. Insulin-regulated  
715 release from the endosomal recycling compartment is regulated by budding of specialized  
716 vesicles. *Molecular biology of the cell*. 2001;12(11):3489-501.
- 717 13. Chen Y, Wang Y, Zhang J, Deng Y, Jiang L, Song E, et al. Rab10 and myosin-Va  
718 mediate insulin-stimulated GLUT4 storage vesicle translocation in adipocytes. *The Journal of*  
719 *cell biology*. 2012;198(4):545-60.
- 720 14. Blot V, McGraw TE. Molecular mechanisms controlling GLUT4 intracellular retention.  
721 *Molecular biology of the cell*. 2008;19(8):3477-87.
- 722 15. Piper RC, Tai C, Kulesza P, Pang S, Warnock D, Baenziger J, et al. GLUT-4 NH2  
723 terminus contains a phenylalanine-based targeting motif that regulates intracellular  
724 sequestration. *The Journal of cell biology*. 1993;121(6):1221-32.
- 725 16. Govers R, Coster AC, James DE. Insulin increases cell surface GLUT4 levels by dose  
726 dependently discharging GLUT4 into a cell surface recycling pathway. *Mol Cell Biol*.  
727 2004;24(14):6456-66.

- 728 17. Gonzalez E, McGraw TE. Insulin signaling diverges into Akt-dependent and -  
729 independent signals to regulate the recruitment/docking and the fusion of GLUT4 vesicles to the  
730 plasma membrane. *Molecular biology of the cell*. 2006;17(10):4484-93.
- 731 18. Xiong W, Jordens I, Gonzalez E, McGraw TE. GLUT4 is sorted to vesicles whose  
732 accumulation beneath and insertion into the plasma membrane are differentially regulated by  
733 insulin and selectively affected by insulin resistance. *Molecular biology of the cell*.  
734 2010;21(8):1375-86.
- 735 19. Bai L, Wang Y, Fan J, Chen Y, Ji W, Qu A, et al. Dissecting multiple steps of GLUT4  
736 trafficking and identifying the sites of insulin action. *Cell metabolism*. 2007;5(1):47-57.
- 737 20. Sano H, Kane S, Sano E, Miinea CP, Asara JM, Lane WS, et al. Insulin-stimulated  
738 phosphorylation of a Rab GTPase-activating protein regulates GLUT4 translocation. *The*  
739 *Journal of biological chemistry*. 2003;278(17):14599-602.
- 740 21. Eguez L, Lee A, Chavez JA, Miinea CP, Kane S, Lienhard GE, et al. Full intracellular  
741 retention of GLUT4 requires AS160 Rab GTPase activating protein. *Cell metabolism*.  
742 2005;2(4):263-72.
- 743 22. Sano H, Eguez L, Teruel MN, Fukuda M, Chuang TD, Chavez JA, et al. Rab10, a target  
744 of the AS160 Rab GAP, is required for insulin-stimulated translocation of GLUT4 to the  
745 adipocyte plasma membrane. *Cell metabolism*. 2007;5(4):293-303.
- 746 23. Lansey MN, Walker NN, Hargett SR, Stevens JR, Keller SR. Deletion of Rab GAP  
747 AS160 modifies glucose uptake and GLUT4 translocation in primary skeletal muscles and  
748 adipocytes and impairs glucose homeostasis. *American journal of physiology Endocrinology*  
749 *and metabolism*. 2012;303(10):E1273-86.
- 750 24. Sadacca LA, Bruno J, Wen J, Xiong W, McGraw TE. Specialized sorting of GLUT4 and  
751 its recruitment to the cell surface are independently regulated by distinct Rabs. *Molecular*  
752 *biology of the cell*. 2013;24(16):2544-57.
- 753 25. Vazirani RP, Verma A, Sadacca LA, Buckman MS, Picatoste B, Beg M, et al. Disruption  
754 of Adipose Rab10-Dependent Insulin Signaling Causes Hepatic Insulin Resistance. *Diabetes*.  
755 2016;65(6):1577-89.
- 756 26. Babbey CM, Bacallao RL, Dunn KW. Rab10 associates with primary cilia and the  
757 exocyst complex in renal epithelial cells. *American journal of physiology Renal physiology*.  
758 2010;299(3):F495-506.
- 759 27. Isabella AJ, Horne-Badovinac S. Rab10-Mediated Secretion Synergizes with Tissue  
760 Movement to Build a Polarized Basement Membrane Architecture for Organ Morphogenesis.  
761 *Developmental cell*. 2016;38(1):47-60.
- 762 28. Etoh K, Fukuda M. Rab10 regulates tubular endosome formation through KIF13A and  
763 KIF13B motors. *Journal of cell science*. 2019;132(5).
- 764 29. Liu Y, Xu XH, Chen Q, Wang T, Deng CY, Song BL, et al. Myosin Vb controls  
765 biogenesis of post-Golgi Rab10 carriers during axon development. *Nature communications*.  
766 2013;4:2005.
- 767 30. Wang D, Lou J, Ouyang C, Chen W, Liu Y, Liu X, et al. Ras-related protein Rab10  
768 facilitates TLR4 signaling by promoting replenishment of TLR4 onto the plasma membrane.  
769 *Proceedings of the National Academy of Sciences of the United States of America*.  
770 2010;107(31):13806-11.
- 771 31. Bruno J, Brumfield A, Chaudhary N, Iaea D, McGraw TE. SEC16A is a RAB10 effector  
772 required for insulin-stimulated GLUT4 trafficking in adipocytes. *The Journal of cell biology*.  
773 2016;214(1):61-76.
- 774 32. Sprangers J, Rabouille C. SEC16 in COPII coat dynamics at ER exit sites. *Biochemical*  
775 *Society transactions*. 2015;43(1):97-103.
- 776 33. Whittle JR, Schwartz TU. Structure of the Sec13-Sec16 edge element, a template for  
777 assembly of the COPII vesicle coat. *The Journal of cell biology*. 2010;190(3):347-61.

- 778 34. Blot V, McGraw TE. Use of quantitative immunofluorescence microscopy to study  
779 intracellular trafficking: studies of the GLUT4 glucose transporter. *Methods Mol Biol.*  
780 2008;457:347-66.
- 781 35. Ong S-E, Blagoev B, Kratchmarova I, Kristensen DB, Steen H, Pandey A, et al. Stable  
782 Isotope Labeling by Amino Acids in Cell Culture, SILAC, as a Simple and Accurate Approach to  
783 Expression Proteomics. *Molecular & Cellular Proteomics.* 2002;1(5):376-86.
- 784 36. Ibarrola N, Kalume DE, Gronborg M, Iwahori A, Pandey A. A proteomic approach for  
785 quantitation of phosphorylation using stable isotope labeling in cell culture. *Anal Chem.*  
786 2003;75(22):6043-9.
- 787 37. Garza LA, Birnbaum MJ. Insulin-responsive aminopeptidase trafficking in 3T3-L1  
788 adipocytes. *The Journal of biological chemistry.* 2000;275(4):2560-7.
- 789 38. Morris NJ, Ross SA, Lane WS, Moestrup SK, Petersen CM, Keller SR, et al. Sortilin is  
790 the major 110-kDa protein in GLUT4 vesicles from adipocytes. *The Journal of biological*  
791 *chemistry.* 1998;273(6):3582-7.
- 792 39. Consortium TGO. The Gene Ontology Resource: 20 years and still GOing strong.  
793 *Nucleic acids research.* 2019;47(D1):D330-d8.
- 794 40. Ashburner M, Ball CA, Blake JA, Botstein D, Butler H, Cherry JM, et al. Gene ontology:  
795 tool for the unification of biology. *The Gene Ontology Consortium. Nature genetics.*  
796 2000;25(1):25-9.
- 797 41. Braulke T, Bonifacino JS. Sorting of lysosomal proteins. *Biochim Biophys Acta.*  
798 2009;1793(4):605-14.
- 799 42. Petris MJ, Mercer JF, Culvenor JG, Lockhart P, Gleeson PA, Camakaris J. Ligand-  
800 regulated transport of the Menkes copper P-type ATPase efflux pump from the Golgi apparatus  
801 to the plasma membrane: a novel mechanism of regulated trafficking. *The EMBO journal.*  
802 1996;15(22):6084-95.
- 803 43. Zhang M, Chang H, Zhang Y, Yu J, Wu L, Ji W, et al. Rational design of true monomeric  
804 and bright photoactivatable fluorescent proteins. *Nature methods.* 2012;9(7):727-9.
- 805 44. Tan S, Ng Y, James DE. Next-generation Akt inhibitors provide greater specificity:  
806 effects on glucose metabolism in adipocytes. *The Biochemical journal.* 2011;435(2):539-44.
- 807 45. Cole NB, Sciaky N, Marotta A, Song J, Lippincott-Schwartz J. Golgi dispersal during  
808 microtubule disruption: regeneration of Golgi stacks at peripheral endoplasmic reticulum exit  
809 sites. *Molecular biology of the cell.* 1996;7(4):631-50.
- 810 46. Thyberg J, Moskalewski S. Role of microtubules in the organization of the Golgi  
811 complex. *Exp Cell Res.* 1999;246(2):263-79.
- 812 47. Olson AL, Trumbly AR, Gibson GV. Insulin-mediated GLUT4 translocation is dependent  
813 on the microtubule network. *The Journal of biological chemistry.* 2001;276(14):10706-14.
- 814 48. Kristiansen S, Richter EA. GLUT4-containing vesicles are released from membranes by  
815 phospholipase D cleavage of a GPI anchor. *American journal of physiology Endocrinology and*  
816 *metabolism.* 2002;283(2):E374-82.
- 817 49. Sun Y, Chiu TT, Foley KP, Bilan PJ, Klip A. Myosin Va mediates Rab8A-regulated  
818 GLUT4 vesicle exocytosis in insulin-stimulated muscle cells. *Molecular biology of the cell.*  
819 2014;25(7):1159-70.
- 820 50. Zeigerer A, Lampson MA, Karylowski O, Sabatini DD, Adesnik M, Ren M, et al. GLUT4  
821 retention in adipocytes requires two intracellular insulin-regulated transport steps. *Molecular*  
822 *biology of the cell.* 2002;13(7):2421-35.
- 823 51. Roccisana J, Sadler JB, Bryant NJ, Gould GW. Sorting of GLUT4 into its insulin-  
824 sensitive store requires the Sec1/Munc18 protein mVps45. *Molecular biology of the cell.*  
825 2013;24(15):2389-97.
- 826 52. Semiz S, Park JG, Nicoloso SM, Furcinitti P, Zhang C, Chawla A, et al. Conventional  
827 kinesin KIF5B mediates insulin-stimulated GLUT4 movements on microtubules. *The EMBO*  
828 *journal.* 2003;22(10):2387-99.

- 829 53. Imamura T, Huang J, Usui I, Satoh H, Bever J, Olefsky JM. Insulin-induced GLUT4  
830 translocation involves protein kinase C-lambda-mediated functional coupling between Rab4 and  
831 the motor protein kinesin. *Mol Cell Biol.* 2003;23(14):4892-900.
- 832 54. Roland JT, Bryant DM, Datta A, Itzen A, Mostov KE, Goldenring JR. Rab GTPase-  
833 Myo5B complexes control membrane recycling and epithelial polarization. *Proceedings of the*  
834 *National Academy of Sciences of the United States of America.* 2011;108(7):2789-94.
- 835 55. Klumperman J. Architecture of the mammalian Golgi. *Cold Spring Harb Perspect Biol.*  
836 2011;3(7).
- 837 56. Cho HJ, Yu J, Xie C, Rudrabhatla P, Chen X, Wu J, et al. Leucine-rich repeat kinase 2  
838 regulates Sec16A at ER exit sites to allow ER-Golgi export. *The EMBO journal.*  
839 2014;33(20):2314-31.
- 840 57. Steger M, Tonelli F, Ito G, Davies P, Trost M, Vetter M, et al. Phosphoproteomics  
841 reveals that Parkinson's disease kinase LRRK2 regulates a subset of Rab GTPases. *Elife.*  
842 2016;5.
- 843 58. Lara Ordonez AJ, Fernandez B, Fdez E, Romo-Lozano M, Madero-Perez J, Lobbetael  
844 E, et al. RAB8, RAB10 and RILPL1 contribute to both LRRK2 kinase-mediated centrosomal  
845 cohesion and ciliogenesis deficits. *Hum Mol Genet.* 2019;28(21):3552-68.
- 846 59. Dhekne HS, Yanatori I, Gomez RC, Tonelli F, Diez F, Schule B, et al. A pathway for  
847 Parkinson's Disease LRRK2 kinase to block primary cilia and Sonic hedgehog signaling in the  
848 brain. *Elife.* 2018;7.
- 849 60. Camus SM, Camus MD, Figueras-Novoa C, Boncompain G, Sadacca LA, Esk C, et al.  
850 CHC22 clathrin mediates traffic from early secretory compartments for human GLUT4 pathway  
851 biogenesis. *The Journal of cell biology.* 2020;219(1).
- 852 61. Martin S, Ramm G, Lyttle CT, Meerloo T, Stoorvogel W, James DE. Biogenesis of  
853 insulin-responsive GLUT4 vesicles is independent of brefeldin A-sensitive trafficking. *Traffic.*  
854 2000;1(8):652-60.
- 855 62. Lampson MA, Racz A, Cushman SW, McGraw TE. Demonstration of insulin-responsive  
856 trafficking of GLUT4 and vpTR in fibroblasts. *Journal of cell science.* 2000;113 ( Pt 22):4065-76.
- 857 63. Blot V, McGraw TE. GLUT4 is internalized by a cholesterol-dependent nystatin-sensitive  
858 mechanism inhibited by insulin. *The EMBO journal.* 2006;25(24):5648-58.
- 859 64. Graumann J, Hubner NC, Kim JB, Ko K, Moser M, Kumar C, et al. Stable isotope  
860 labeling by amino acids in cell culture (SILAC) and proteome quantitation of mouse embryonic  
861 stem cells to a depth of 5,111 proteins. *Mol Cell Proteomics.* 2008;7(4):672-83.
- 862 65. Cox J, Mann M. MaxQuant enables high peptide identification rates, individualized  
863 p.p.b.-range mass accuracies and proteome-wide protein quantification. *Nat Biotechnol.*  
864 2008;26(12):1367-72.

865



## FIGURES & FIGURE LEGENDS

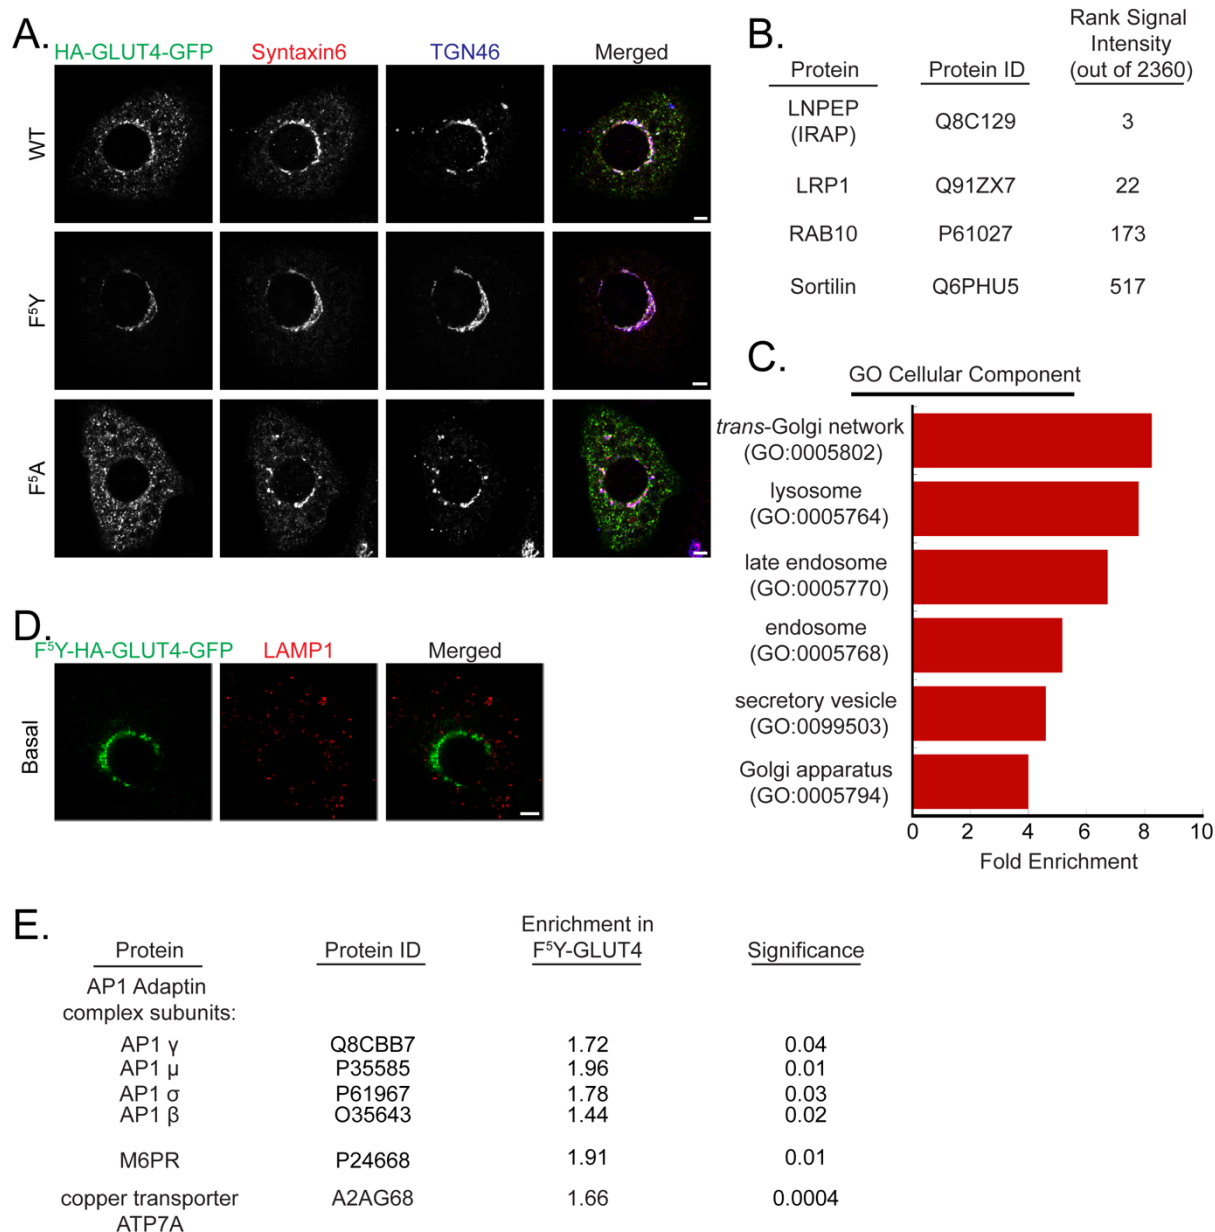

### Figure 1. Proteomic analysis of GLUT4-containing perinuclear compartments.

**A.** Representative Airyscan confocal single plane images of cells expressing wildtype (WT), F<sup>5Y</sup>-, or F<sup>5A</sup>-HA-GLUT4-GFP and labeled for Syntaxin6 and TGN46 by IF. **B.** Proteins identified in immunoabsorption experiments that are known to colocalize with GLUT4, rank based on summed signal intensity from 4 immunoabsorption experiments. **C.** Panther Gene Ontology (GO) cellular component analysis for localization of proteins increased in F<sup>5Y</sup>-GLUT4 compartments immunoabsorption. **D.** Representative Airyscan confocal single plane images of cells expressing F<sup>5Y</sup>-HA-GLUT4-GFP mutant and labeled for LAMP1 by IF. **E.** Fold increase of AP1 adaptin complex subunits, mannose 6-phosphate receptor (MPR), and copper transporter ATP7A in F<sup>5Y</sup>-GLUT4 compartments immunoabsorption. Bars, 5  $\mu$ m.

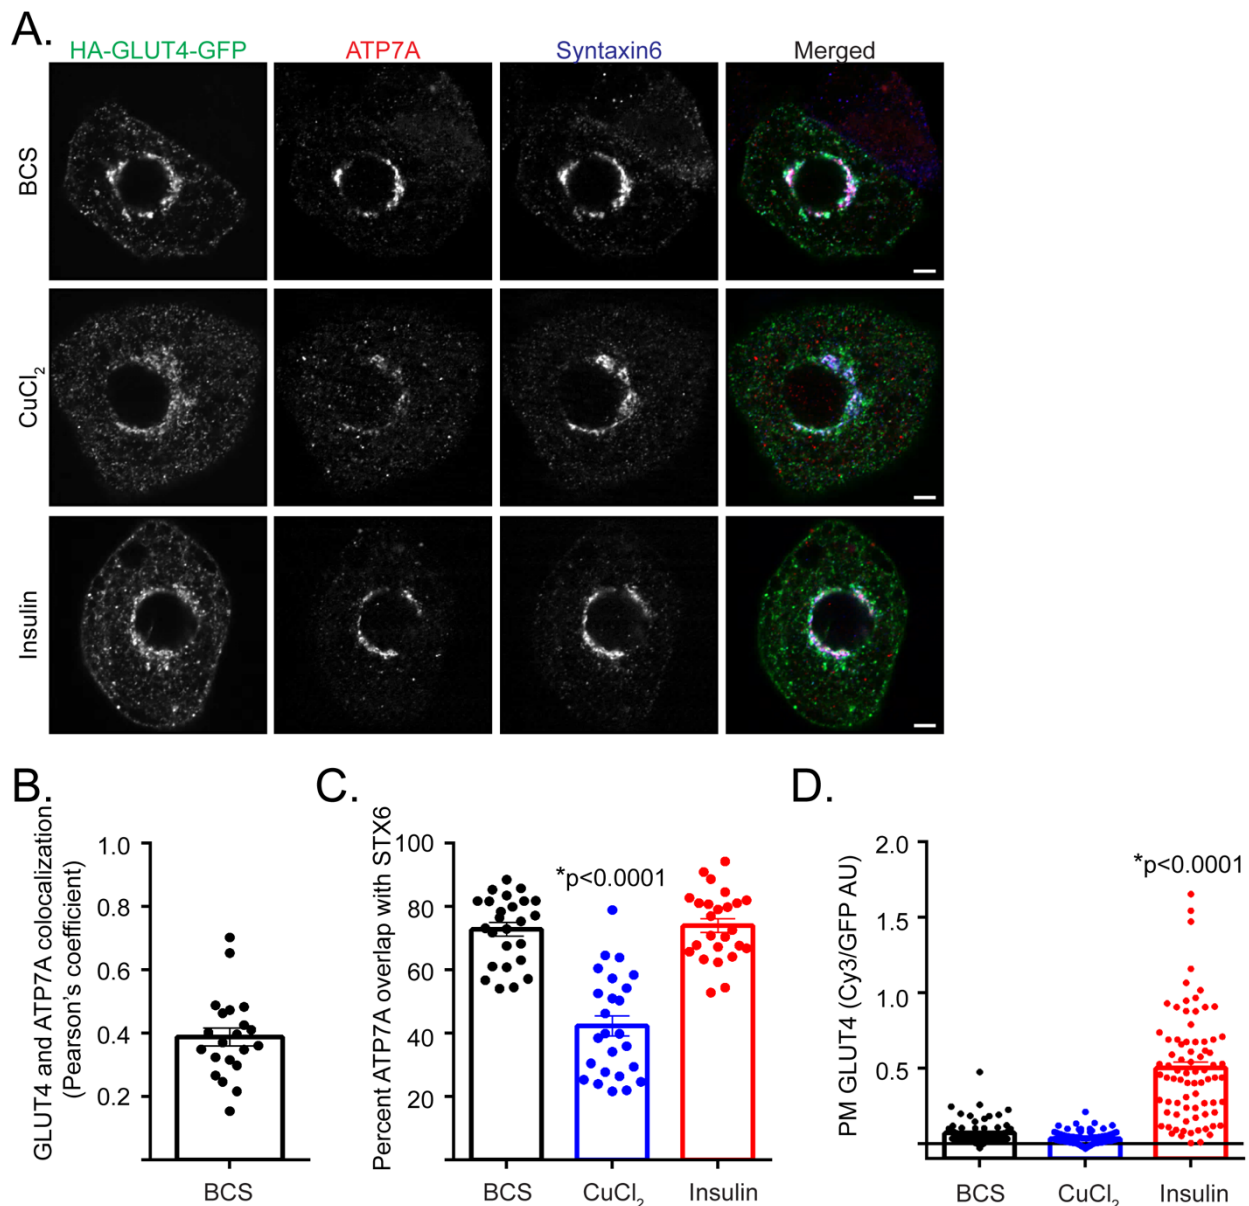

**Figure 2. Copper, but not insulin, stimulation results in mobilization of the copper transporter ATP7A from GLUT4-containing perinuclear compartments.**

**A.** Representative Airyscan confocal single plane images of cells expressing HA-GLUT4-GFP and labeled for native copper transporter ATP7A and Syntaxin6 by IF. Cells treated with 200 $\mu$ M BCS, followed by treatment with 200 $\mu$ M copper or 1nM insulin as described in materials and methods. Bars, 5  $\mu$ m. **B.** Pearson's correlation coefficient (r) for colocalization between GLUT4 and ATP7A in 3T3-L1 adipocytes under BCS condition. Individual cells  $\pm$  SEM from N = 3 assays. **C.** Quantification of percent overlap of ATP7A with Syntaxin6 under BCS, copper, and insulin-stimulated conditions in 3T3-L1 adipocytes. Individual cells  $\pm$  SEM from N = 3 assays. **D.** Representative experiment of quantification of PM to total HA-GLUT4-GFP in cells under BCS, copper, and insulin-stimulated conditions, as described in materials and methods. Individual cells  $\pm$  SEM. AU, arbitrary units.

\*,  $p < 0.05$  compared to BCS condition, two-tailed unpaired t-test, nonnormalized raw data.



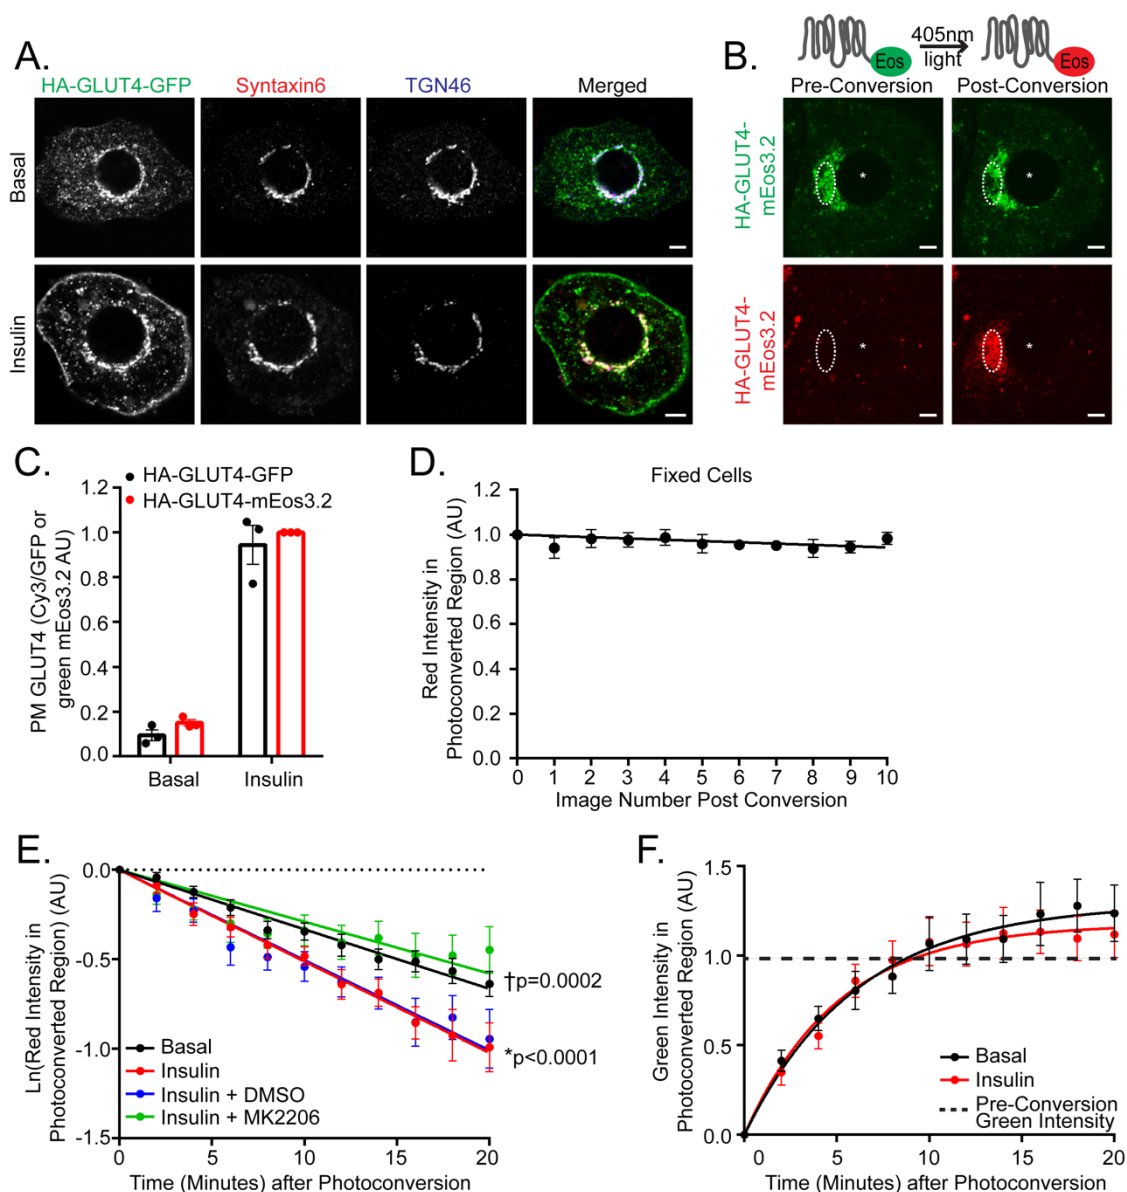

**Figure 3. Insulin promotes mobilization of HA-GLUT4-mEos3.2 from the perinuclear region downstream of AKT.**

**A.** Representative Airyscan confocal single plane images of basal and insulin-stimulated cells expressing HA-GLUT4-GFP and labeled for Syntaxin6 and TGN46 by IF. **B.** Representative Airyscan confocal single plane images of cells expressing HA-GLUT4-mEos3.2. Green HA-GLUT4-mEos3.2 photoconverted to red HA-GLUT4-mEos3.2 in the perinuclear region (indicated by white, dashed circle) as described in material and methods. \*, indicates nucleus. **C.** Quantification of PM to total HA-GLUT4-GFP or HA-GLUT4-mEos3.2 as described in materials and methods. Serum starved cells stimulated with 10nM insulin. Values normalized to HA-GLUT4-mEos3.2 expressing, insulin condition. N=3 assays  $\pm$  SEM. **D.** Quantification of average red HA-GLUT4-mEos3.2 intensity in the photoconverted perinuclear region of fixed cells for 10 successive images. Values normalized to image 0. Mean normalized values  $\pm$  SEM, N=2 assays, 6-7 cells per assay. **E.** Quantification of average red HA-GLUT4-mEos3.2 intensity in the photoconverted perinuclear region of live cells. Prior to photoconversion serum starved cells stimulated with 10nM insulin, 1 $\mu$ M AKT inhibitor MK2206, or equivalent volume of DMSO, where indicated, as described in materials and methods. Values normalized to value at time 0. Mean normalized values  $\pm$  SEM, N=5-6 assays, 4-7 cells per assay. \*, p<0.05 comparing basal and insulin-stimulated slopes. †, p<0.05 comparing insulin + DMSO and insulin + MK2206-stimulated slopes. **F.** Quantification of average green HA-GLUT4-mEos3.2 intensity in the photoconverted perinuclear region of live cells. Prior to

photoconversion serum starved cells stimulated with 10nM insulin where indicated. Values normalized to value at time 0. Mean normalized values  $\pm$  SEM, N=5-6 assays, 4-7 cells per assay. AU, arbitrary units. Bars, 5  $\mu$ m.

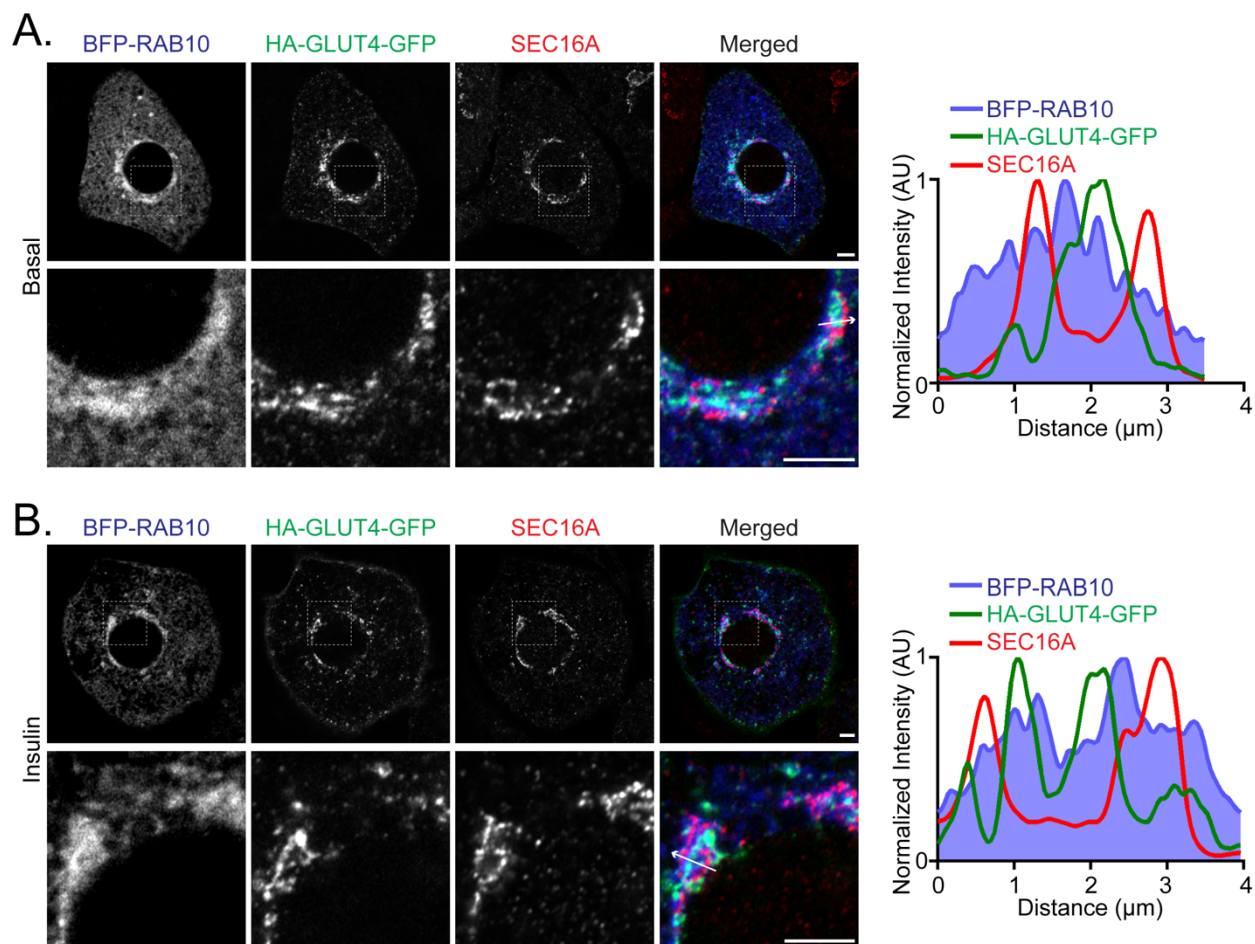

**Figure 4. RAB10 colocalizes with HA-GLUT4-GFP and SEC16A at the perinuclear region.**

**A and B.** Representative Airyscan confocal single plane images of (A) basal and (B) insulin-stimulated cells expressing BFP-RAB10 and HA-GLUT4-GFP, and labeled for endogenous SEC16A by IF. Serum starved cells stimulated with 1nM insulin. Inset (white, dashed boxed region) displayed below. Linescan plot is BFP-RAB10, HA-GLUT4-GFP, and SEC16A fluorescence intensity along a line (indicated by white arrow). Values normalized to each individual fluorescence maxima. Bars, 5  $\mu\text{m}$ .

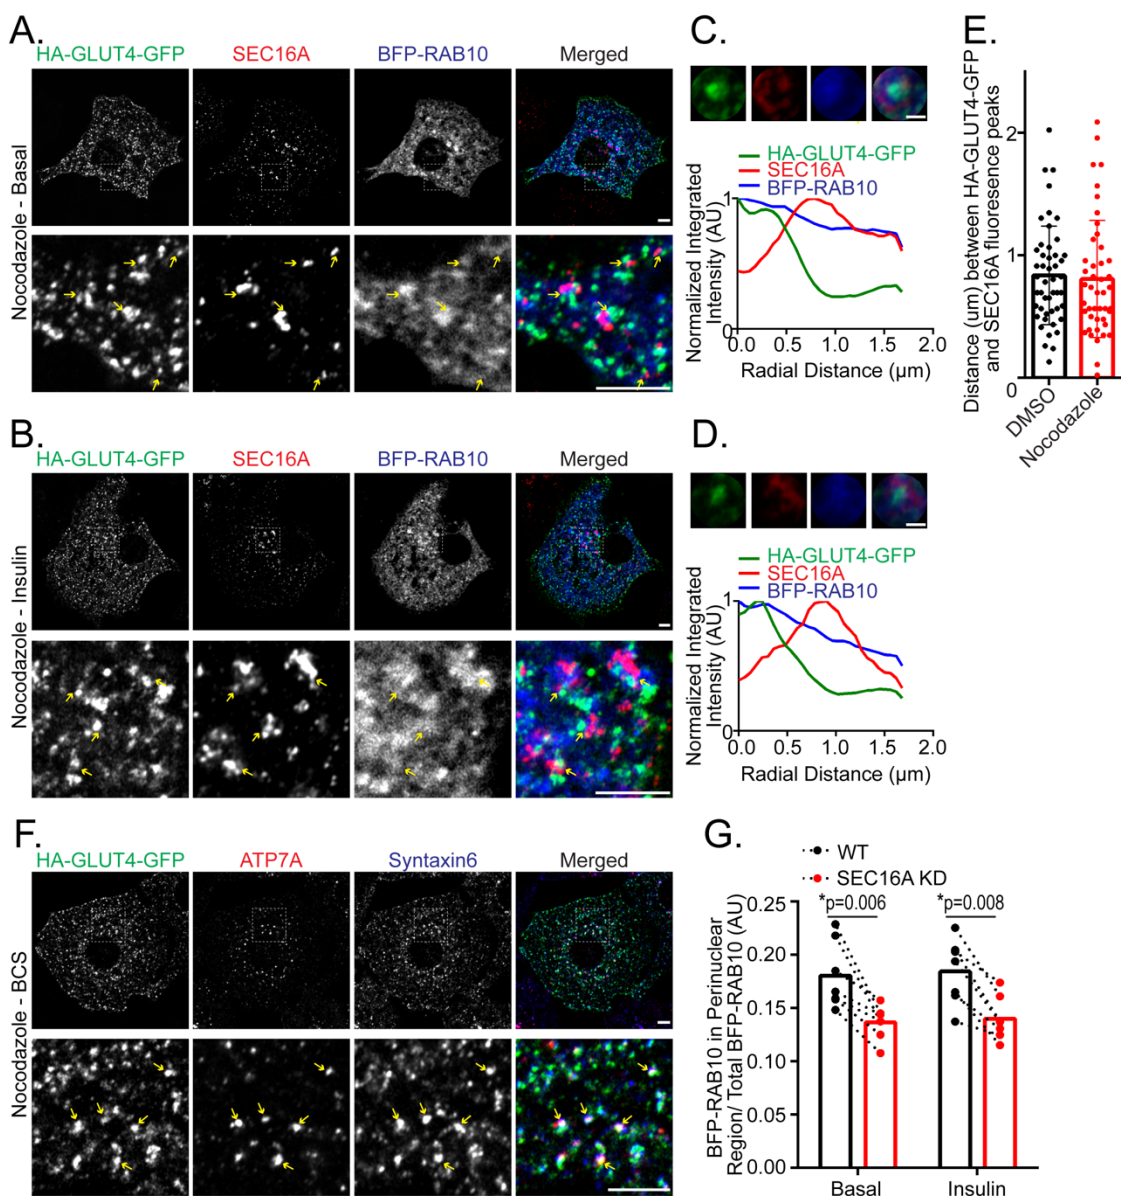

**Figure 5. The organization of perinuclear RAB10 and SEC16A with GLUT4 has implications for their function in GLUT4 trafficking.**

**A and B.** Representative Airyscan confocal single plane images of cells treated with 3 $\mu\text{M}$  nocodazole. Cells expressing HA-GLUT4-GFP and BFP-RAB10 and stained for endogenous SEC16A by IF. Cells under (A) basal and (B) 1nM insulin-stimulated conditions. Inset (white, dashed boxed region) displayed below. Yellow arrows indicate the same position in each image. Bars, 5  $\mu\text{m}$ . **C and D.** Images of the average HA-GLUT4-GFP, SEC16A, and BFP-RAB10 fluorescence intensity from 5 individual fragments, centered of HA-GLUT4-GFP, resulting from nocodazole treatment from the cells in A and B respectively. Radial linescan plot of images displayed below. Values normalized to each individual fluorescence maxima. Bars, 1  $\mu\text{m}$ . **E.** Quantification of the distance ( $\mu\text{m}$ ) between HA-GLUT4-GFP and SEC16A fluorescence peaks in basal cells in the presence and absence of nocodazole treatment. Values are distances between peaks  $\pm$  SEM. Distance measured for 3 separate sets of peaks per cell. N=2 assays, 7-8 cells per assay. **F.** Representative Airyscan confocal single plane images of cells treated with 3 $\mu\text{M}$  nocodazole in the presence of 200 $\mu\text{M}$  BCS. Cells expressing HA-GLUT4-GFP and stained for endogenous ATP7A and Syntaxin6 by IF. Inset (white, dashed boxed region) displayed below. Yellow arrows indicate the same position in each image. Bars, 5  $\mu\text{m}$ . **G.** Quantification of the fraction of BFP-RAB10 in the perinuclear region of basal and 1nM insulin-stimulated cells  $\pm$  addition of siRNA targeting

SEC16A. N=7 assays  $\pm$  SEM. Dashed line connects data from individual assays. \*,  $p < 0.05$ , two-tailed unpaired t-test, nonnormalized raw data.

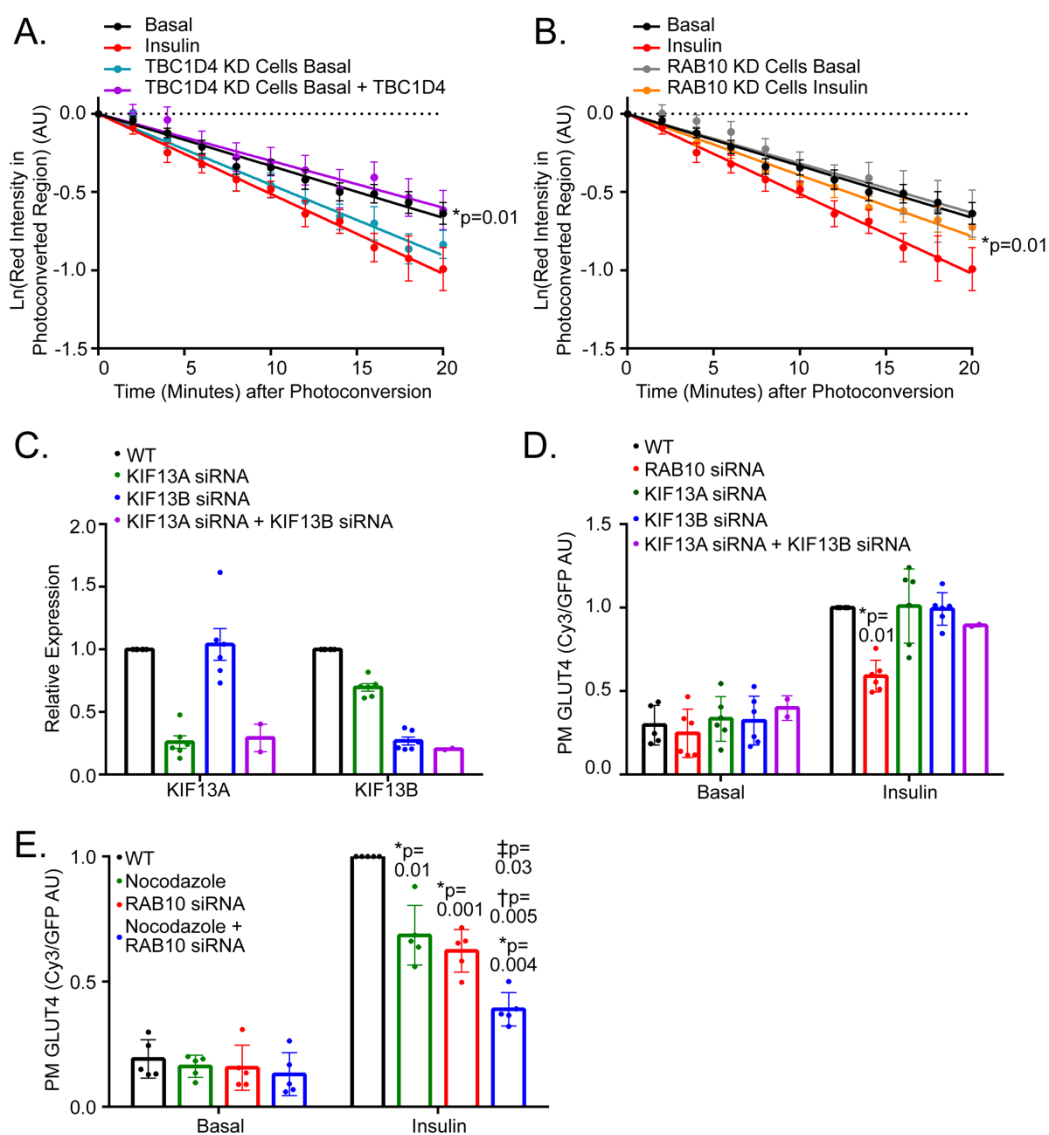

AU, arbitrary units.

**Figure 6. The TBC1D4-RAB10 module regulates insulin-stimulated mobilization of GLUT4 from the perinuclear region.**

**A.** Quantification of average red HA-GLUT4-mEos3.2 intensity in the photoconverted perinuclear region of basal live cells with stable knockdown of TBC1D4. Cells expressing exogenous TBC1D4 where indicated. Data from basal and insulin-stimulated wildtype cells (Fig. 3E) displayed. Values normalized to value at time 0. Mean normalized values  $\pm$  SEM, N=3-4 assays, 5 cells per assay. \*, p<0.05 comparing basal TBC1D4 KD and basal TBC1D4 KD + TBC1D4 slopes. **B.** Quantification of average red HA-GLUT4-mEos3.2 intensity in the photoconverted perinuclear region of live cells with stable knockdown of RAB10 under basal and 10nM insulin stimulated conditions. Data from basal and insulin-stimulated wildtype cells (Fig. 3E) displayed. Values normalized to value at time 0. Mean normalized values  $\pm$  SEM, N=3-4 assays, 4-6 cells per assay. \*, p<0.05 comparing basal RAB10 KD and insulin-stimulated RAB10 KD slopes. **C.** Quantitative RT-PCR of relative KIF13A or KIF13B mRNA expression in control 3T3-L1 adipocytes and those electroporated with KIF13A and/or KIF13B siRNAs. N=6 assays. **D.** Quantification of PM to total HA-GLUT4-GFP in serum starved cells stimulated with 1nM insulin. Values normalized to wildtype, insulin condition. N=2-6 assays  $\pm$  SEM. \*, p<0.05 compared to wildtype insulin-stimulated condition, two-tailed unpaired t-test, nonnormalized raw data. **E.** Quantification of PM to total HA-GLUT4-GFP in serum starved cells stimulated with 1nM insulin. siRNA targeting RAB10 electroporated where indicated, and 3 $\mu$ M nocodazole (or an equivalent volume of DMSO) added where indicated. Values normalized to wildtype, insulin condition. N=5 assays  $\pm$  SEM. \*, p<0.05 compared to



wildtype, insulin condition, †,  $p < 0.05$  compared to nocodazole, insulin condition, and ‡,  $p < 0.05$  compared to RAB10 KD, insulin condition, two-tailed paired t-test, nonnormalized raw data.  
AU, arbitrary units.

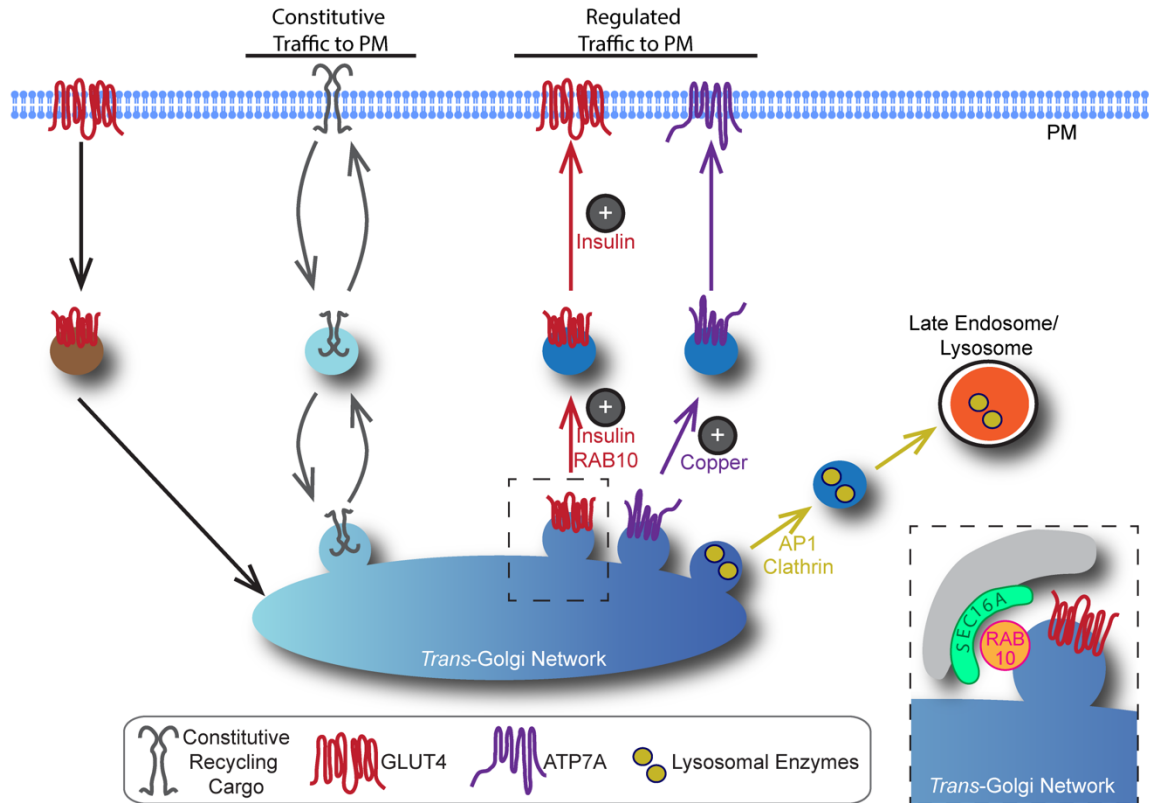

**Figure 7. Model of GLUT4 trafficking in 3T3-L1 adipocytes.**

In 3T3-L1 adipocytes the biogenesis of GLUT4-containing vesicles (IRVs), copper transporter ATP7A-containing vesicles, and vesicles containing lysosomal recycling proteins through the TGN occurs at an independent domain. Mobilization of ATP7A from the TGN is promoted by copper stimulation. The diversion of vesicles containing lysosomal enzymes away from traffic from the PM is mediated by the AP1 clathrin adaptor. The exocytosis of GLUT4 to the PM is accelerated by insulin. Insulin accelerates the recruitment, docking, and fusion of GLUT4-containing insulin responsive vesicles (IRVs) with the PM. Insulin also promotes the mobilization of GLUT4 from the perinuclear TGN, replenishing the IRV pool. This is important because GLUT4 in the PM is rapidly trafficked back to the TGN via the endosomal pathway. Mobilization of GLUT4 from the perinuclear region is regulated by TBC1D4, and insulin-stimulated acceleration of GLUT4 mobilization requires RAB10. Inset, SEC16A-labeled structures reside adjacent to GLUT4-containing membranes, and SEC16A organizes RAB10 at the perinuclear region.
